# Supplementary material for: Administration of Non-Absorbable Antibiotics to Pregnant Mice to Perturb the Maternal Gut Microbiota Is Associated with Alterations in Offspring Behavior
Source: PLoS One. 2016 Jan 20;11(1):e0138293. doi: 10.1371/journal.pone.0138293 (PMC4720425; doi:10.1371/journal.pone.0138293)
Supplement: S2 Data — (XLSX) [file pone.0138293.s002.xlsx]

## Sheet: Raw data Fig. 2a
	male	P7	male	P7			Control	AB
	B6cont1♂	3.8	B6AB1♂	3.3		Average	3.95185	3.44667
	B6cont1♂	3.9	B6AB2♂	2.9		SE	0.079952	0.0939918
	B6cont1♂	4	B6AB2♂	2.6
	B6cont1♂	3.7	B6AB2♂	3.2
	B6cont1♂	3.9	B6AB2♂	3.5
	B6cont1♂	3.3	B6AB2♂	2.8
	B6cont3♂	3	B6AB6♂	3.5
	B6cont3♂	3.4	B6AB6♂	3.5
	B6cont4♂	3.5	B6AB6♂	3.5
	B6cont4♂	3.9	B6AB6♂	3.5
	B6cont4♂	3.8	B6AB7♂	3.8
	B6cont4♂	3.9	B6AB7♂	3.6
	B6cont5♂	4.5	B6AB7♂	4
	B6cont5♂	5	B6AB7♂	4
	B6cont5♂	4.7	B6AB7♂	4
	B6cont6♂	3.9	Average	3.44667
	B6cont6♂	4	SE	0.0939918
	B6cont6♂	3.9	SD	0.430725
	B6cont6♂	3.9		0.0023
	B6cont8♂	4.2		Mann-Whitney U test
	B6cont8♂	4.4
	B6cont8♂	4.3
	B6cont8♂	4.3
	B6cont10♂	3.9
	B6cont10♂	4
	B6cont10♂	3.8
	B6cont10♂	3.8
	Average	3.95185
	SE	0.079952
	SD	0.415443

## Sheet: Raw data Fig. 2b
B6cont1♂L0R0	16.6		B6AB1♂L0R0	15			Control	AB
B6cont1♂L0R1	17.9		B6AB2♂L0R1	15.6		Average	16.1467	14.2222
B6cont1♂L1R0	18		B6AB2♂L1R0	13.2		SE	0.414828	0.419582
B6cont1♂L1R1	17.2		B6AB2♂L1R1	14
B6cont1♂L0R2	16.3		B6AB2♂L0R2	15
B6cont1♂L2R0	14		B6AB2♂L2R0	11.4
B6cont4♂L0R0	17		B6AB13♂L0R0	14.6
B6cont4♂L0R1	16.2		B6AB13♂L0R1	14.4
B6cont4♂L1R0	15.5		B6AB13♂L1R0	14.8
B6cont4♂L1R1	12.1		Average	14.2222
B6cont4♂L0R2	14.6		SE	0.419582
B6cont5♂L0R0	17.6		SD	1.25875
B6cont5♂L0R1	16.3		vsP28Control	0.0057
B6cont5♂L1R0	17.3
B6cont11♂L0R0	15.6
Average	16.1467
SE	0.414828
SD	1.60662

## Sheet: Body weight littersize P28-29
P28	B6cont1♂L0R0	16.6	P28	B6AB1♂L0R0	15		P29	B6cont3♂L0R0	15.6	P29	B6AB6♂L0R0	15.2					B6cont1♂L0R0	14.8		B6AB1♂L0R0	15			Mother	male	female	littersize at P7	Body weight of offspring from each mother (P28 and P29)							Mother	male	female	littersize at weaning	Body weight of offspring from each mother (P28 and P29)
	B6cont1♂L0R1	17.9		B6AB2♂L0R1	15.6			B6cont3♂L0R1	15.2		B6AB6♂L0R1	14.9					B6cont1♂L0R1	16.3		B6AB2♂L0R1	15.6			B6Cont1	6	2	8	16.6	17.9	18	17.2	16.3	14		B6AB1	1	3	4	15	15.6	13.2
	B6cont1♂L1R0	18		B6AB2♂L1R0	13.2			B6cont6♂L0R0	17.1		B6AB6♂L1R0	14.9					B6cont1♂L1R0	16.5		B6AB2♂L1R0	13.2			B6Cont3	2	2	4	15.6	15.2						B6AB2	5	1	6	14	15	11.4
	B6cont1♂L1R1	17.2		B6AB2♂L1R1	14			B6cont6♂L0R1	17.2		B6AB6♂L1R1	14.4					B6cont1♂L1R1	15.9		B6AB2♂L1R1	14			B6Cont4	4	5	9	17	16.2	15.5	12.1	14.6			B6AB6	4	2	6	15.2	14.9	14.9	14.4
	B6cont1♂L0R2	16.3		B6AB2♂L0R2	15			B6cont6♂L1R0	16.2		B6AB7♂L0R0	17.1					B6cont1♂L0R2	16.3		B6AB2♂L0R2	15			B6Cont5	3	1	4	17.6	16.3	17.3					B6AB7	5	4	9	17.1	17.4	17	15.2	15.3
	B6cont1♂L2R0	14		B6AB2♂L2R0	11.4			B6cont8♂L0R0	18.1		B6AB7♂L0R1	17.4					B6cont1♂L2R0	14		B6AB2♂L2R0	11.4			B6cont6	3	4	7	17.1	17.2	16.2					B6AB13	3	2	5	14.6	14.4	14.8
	B6cont4♂L0R0	17		B6AB13♂L0R0	14.6			B6cont8♂L0R1	16.9		B6AB7♂L1R0	17					B6cont3♂L0R0	15.6	P29	B6AB6♂L0R0	15.2			B6cont8	4	2	6	18.1	16.9	16.2	16.3
	B6cont4♂L0R1	16.2		B6AB13♂L0R1	14.4			B6cont8♂L1R0	16.2		B6AB7♂L1R1	15.2					B6cont3♂L0R1	15.2	P29	B6AB6♂L0R1	14.9			B6cont10	4	2	6	17.3	16.9	18	15.9
	B6cont4♂L1R0	15.5		B6AB13♂L1R0	14.8			B6cont8♂L1R1	16.3		B6AB7♂L0R2	15.3					B6cont4♂L0R0	17		B6AB6♂L1R0	14.9			B6cont11	2	6	8	15.6	13.8
	B6cont4♂L1R1	12.1		Average	14.2222			B6cont10♂L0R0	17.3		Average	15.7111					B6cont4♂L0R1	16.2		B6AB6♂L1R1	14.4	P29
	B6cont4♂L0R2	14.6		SE	0.419582			B6cont10♂L0R1	16.9		SE	0.375812					B6cont4♂L1R0	15.5		B6AB7♂L0R０	17.1	P29
	B6cont5♂L0R0	17.6		SD	1.25875			B6cont10♂L1R0	18		SD	1.12744					B6cont4♂L0R2	14.6		B6AB7♂L0R1	17.4	P29	Control												AB
	B6cont5♂L0R1	16.3		vsP28Control	0.0095			B6cont10♂L1R1	15.9		vs P28AB	0.7657					B6cont5♂L0R0	17.6		B6AB7♂L1R0	17	P29	littersize	4	5	6	7	8	9	Littersize	Body weight at P28	Body weight at P29			littersize	4	5	6	7	8	9	Littersize	Body weight at P28	Body weight at P29
	B6cont5♂L1R0	17.3						B6cont11♂L0R1	13.8		vs P29Control	0.0419					B6cont5♂L0R1	16.3		B6AB7♂L1R1	15.2	P29		17.6		18.1	17.1	16.6	17	1						15	14.6	14			17.1	1
	B6cont11♂L0R0	15.6						Average	16.4786								B6cont5♂L1R0	17.3		B6AB7♂L0R2	15.1	P29		16.3		16.9	17.2	17.9	16.2	2						15.6	14.4	15			17.4	2
	Average	16.1467						SE	0.321777				Mann-Whitney test				B6cont6♂L0R0	17.1	P29	B6AB13♂L0R0	14.6			17.3		16.2	16.2	18	15.5	3						13.2	14.8	11.4			17	3
	SE	0.414828						SD	1.16018				Mann-Whitney test				B6cont6♂L0R1	17.2	P29	B6AB13♂L0R1	14.4			15.6		16.3		17.2	12.1	4	17.6	15.6						15.2			15.2	4	15
	SD	1.60662						vs P28Control	0.4913	Mann-Whitney test							B6cont6♂L1R0	16.2	P29	B6AB13♂L1R0	14.8			15.2		17.3		16.3	14.6	4	16.3	15.2						14.9			15.3	4	15.6
																	B6cont8♂L0R0	18.1	P29							16.9		14		4	17.3							14.9				4	13.2
																	B6cont8♂L0R1	16.9	P29							18		15.6		4								14.4				4
																	B6cont8♂L1R0	16.2	P29							15.9		13.8		5					Average	14.6		14.2571	#DIV/0!	#DIV/0!	16.4	5	14.6
																	B6cont8♂L1R1	16.3	P29				Average	16.4		16.95	16.8333	16.175	15.08	6		18.1										5	14.4
P28	Control	AB						P29	Control	AB							B6cont10♂L0R0	17.3	P29											6		16.9										5	14.8
Average	16.1467	14.2222						Average	16.4786	15.7111							B6cont10♂L0R1	16.9	P29											6		16.2										6	14	15.2
SE	0.414828	0.419582						SE	0.321777	0.375812							B6cont10♂L1R0	18	P29											6		16.3										6	15	14.9
																	B6cont10♂L1R1	15.9	P29											6		17.3										6	11.4	14.9
																	B6cont11♂L0R0	15.6												6		16.9										6		14.4
																	B6cont11♂L0R1	13.8	P29											6		18										6
																	Average	16.2357		Average	14.9556									6		15.9										6
																	SE	0.206586		SE	0.327021									6												6
																	SD	1.09315		SD	1.38743									7		17.1										7
																					0.0005									7		17.2										8
																					Mann-Whitney U test									7		16.2										8
																														7												8
																														8	16.6											8
																			Control	AB										8	17.9											8
																		Average	16.2357	14.9556										8	18											8
																		SE	0.206586	0.327021										8	17.2											8
																														8	16.3											8
																														8	14											9		17.1
																														8	15.6											9		17.4
																														8	13.8											9		17
																														9	17											9		15.2
																														9	16.2											9		15.3
																														9	15.5											9
																														9	12.1											9
																														9	14.6											9
																														9												9

## Sheet: Raw data Fig3a
	Control		AB
Control 1	552000000000	AB 1	151000000000
Control 2	2.74e+11	AB 2	256000000000		Copy numbers of fecal bacteria	Control	AB
Control 3	200000000000	AB 3	317000000000		Average	248687500000	2.00083e+11
Control 4	44625000000	AB 4	46500000000		SE	6.86588e+10	3.97023e+10
Control 5	180000000000	AB 5	170000000000
Control 6	241500000000	AB 6	260000000000
Average	248687500000		2.00083e+11
SE	6.86588e+10		3.97023e+10
SD	1.68179e+11		9.72504e+10
	0.553
	Unpaired t test

## Sheet: Raw data Fig3b-d
	Bifidobacterium	Lactobacillales (order)	Bacteroides	Prevotella	Clostridium cluster IV	Clostridium subcluster XIVa	Clostridium cluster XI	Clostridium cluster XVIII	others					Bifidobacterium	Lactobacillales (order)	Bacteroides	Prevotella	Clostridium cluster IV	Clostridium subcluster XIVa	Clostridium cluster XI	Clostridium cluster XVIII	others
Control 1	0.200096	58.8534	18.0269	0.717439	0.730091	14.5554	0.441429	1.95081	4.52441	100			Control 1	0.200096	58.8534	18.0269	0.717439	0.730091	14.5554	0.441429	1.95081	4.52441	100
Control 2	0.412549	35.4764	29.5958	0.600593	0	12.5133	0.927109	0.739066	19.7352	100			Control 2	0.412549	35.4764	29.5958	0.600593	0	12.5133	0.927109	0.739066	19.7352	100
Control 3	0.265563	20.2655	27.9286	0	0	26.494	0	1.41924	23.6271	100			Control 3	0.265563	20.2655	27.9286	0	0	26.494	0	1.41924	23.6271	100
Control 4	0	31.9251	9.12398	0	0	25.1929	0.582255	2.95366	30.2221	100			Control 4	0	31.9251	9.12398	0	0	25.1929	0.582255	2.95366	30.2221	100
Control 5	0	55.3656	24.8062	0	0	14.0219	0.636468	0.323809	4.84599	100			Control 5	0	55.3656	24.8062	0	0	14.0219	0.636468	0.323809	4.84599	100
Control 6	0	50.6566	29.7936	0.618652	0	5.3729	7.69586	0.690724	5.17168	100			Control 6	0	50.6566	29.7936	0.618652	0	5.3729	7.69586	0.690724	5.17168	100
Control average	0.146368	42.0904	23.2125	0.322781	0.121682	16.3584	1.71385	1.34622	14.6877	100			Average	0.146368	42.0904	23.2125	0.322781	0.121682	16.3584	1.71385	1.34622	14.6877
													SE	0.0712314	6.20219	3.33775	0.145263	0.121682	3.29117	1.20279	0.399932	4.60946
AB average	0.181489	20.7053	24.8509	1.68178	0.149513	34.3024	3.76749	0.600425	13.7607	100			SD	0.174481	15.1922	8.17578	0.355819	0.298058	8.0617	2.94622	0.979629	11.2908
AB 1	0	10.8104	28.6331	0	0	37.0136	0	0	23.5429	100
AB 2	0.29301	21.6685	31.9161	5.45206	0	25.4272	0	1.47475	13.7683	100			AB 1	0	10.8104	28.6331	0	0	37.0136	0	0	23.5429	100
AB 3	0.795922	19.1488	9.2992	0	0	47.4721	12.7447	0.345155	10.1941	100			AB 2	0.29301	21.6685	31.9161	5.45206	0	25.4272	0	1.47475	13.7683	100
AB 4	0	21.2921	5.7852	0	0	49.2795	7.16044	0.307283	16.1755	100			AB 3	0.795922	19.1488	9.2992	0	0	47.4721	12.7447	0.345155	10.1941	100
AB 5	0	15.8123	46.9154	0.280422	0	26.0786	0	0	10.9133	100			AB 4	0	21.2921	5.7852	0	0	49.2795	7.16044	0.307283	16.1755	100
AB 6	0	35.4999	26.5564	4.35822	0.897079	20.5432	2.69977	1.47536	7.97001	100			AB 5	0	15.8123	46.9154	0.280422	0	26.0786	0	0	10.9133	100
													AB 6	0	35.4999	26.5564	4.35822	0.897079	20.5432	2.69977	1.47536	7.97001	100
													Average	0.181489	20.7053	24.8509	1.68178	0.149513	34.3024	3.76749	0.600425	13.7607
													SE	0.131873	3.38834	6.21645	1.03001	0.149513	4.96931	2.12779	0.282965	2.27949
													SD	0.323023	8.2997	15.2271	2.52299	0.366231	12.1723	5.21201	0.69312	5.5836
														0.858	0.0127	0.8198	0.864	> 0.9999	0.0132	> 0.9999	0.1682	0.8644
														Mann-Whitney Test	Unpaired t test	Unpaired t test	Mann-Whitney Test	Mann-Whitney Test	Unpaired t test	Mann-Whitney Test	Mann-Whitney Test	Unpaired t test

## Sheet: Raw data Fig S2a and b
	male	female	Litter size			male	female	Litter size
B6cont1	6	2	8		B6AB1	1	3	4		Control	1	8						male offspring (%)	female offspring (%)
B6cont3	2	2	4		B6AB2	5	1	6		Control	1	4					Control dam	57.8616	42.1384
B6cont4	5	4	9		B6AB6	4	2	6		Control	1	9					AB-treated dam	57.5758	42.4242
B6cont5	3	1	4		B6AB7	5	4	9		Control	1	4
B6cont6	3	4	7		B6AB13	3	2	5		Control	1	7						male offspring (%)	female offspring (%)
B6cont8	4	2	6		B6ABE	2	2	4		Control	1	6					Control dam	57.9	42.1
B6cont10	4	2	6		B6ABH	1	2	3		Control	1	6					AB-treated dam	57.6	42.4
B6Cont11	2	6	8		B6ABJ	3	3	6		Control	1	8
B6ContA	4	2	6		B6ABN	2	4	6		Control	1	6
B6ContB	5	3	8		B6ABO	6	1	7		Control	1	8
B6ContC	6	2	8		B6ABS	5	2	7		Control	1	8
B6ContD	5	1	6		B6ABT	1	2	3		Control	1	6
B6ContE	3	3	6		Total	38	28	66		Control	1	6
B6ContF	5	3	8		Average	3.16667	2.33333	5.5		Control	1	8
B6ContG	4	2	6		SE	0.499417	0.273115	0.494727		Control	1	6
B6ContH	3	4	7		STD	1.80067	0.984732	1.78377		Control	1	7
B6ContI	5	2	7		Proportion	57.5758	42.4242			Control	1	7
B6ContJ	2	4	6		vs Control	0.2007	0.3662	0.0548		Control	1	6
B6ContL	4	5	9			Unpaired t test	Mann-Whitney U test	Mann-Whitney U test		Control	1	9
B6ContN	2	4	6							Control	1	6
B6ContO	5	2	7							Control	1	7
B6ContP	3	4	7							Control	1	7
B6ContQ	4	2	6							Control	1	6
B6ContR	3	1	4							Control	1	4
Total	92	67	159							Control	1	6.625
Average	3.83333	2.79167	6.625							AB	2	4
SE	0.253001	0.269051	0.287496							AB	2	6
STD	1.23945	1.31807	1.40844							AB	2	6
Proportion	57.8616	42.1384								AB	2	9
										AB	2	5
										AB	2	4
										AB	2	3
										AB	2	6
										AB	2	6
										AB	2	7
										AB	2	7
										AB	2	3
										AB	2	5.5

## Sheet: Figure S2c
female	P7	female	P7			Control	AB
B6cont1♀	3.7	B6AB1♀	3.1		Average	3.70588	3.4
B6cont1♀	3.7	B6AB1♀	3		SE	0.127323	0.146818
B6cont3♀	2.6	B6AB1♀	2.9
B6cont3♀	2.9	B6AB2♀	2.7
B6Cont4♀	3.4	B6AB6♀	3.4
B6Cont4♀	3.7	B6AB6♀	3.7
B6Cont4♀	3.7	B6AB7♀	4
B6Cont4♀	3.3	B6AB7♀	3.4
B6Cont4♀	3.5	B6AB7♀	3.9
B6cont5♀	4.9	B6AB7♀	3.9
B6cont6♀	3.8	Average	3.4
B6cont6♀	4.1	SE	0.146818
B6cont6♀	3.9	SD	0.46428
B6cont8♀	4.2		0.1403
B6cont8♀	4.3		Unpaired t test
B6cont10♀	3.6
B6cont10♀	3.7
Average	3.70588
SE	0.127323
SD	0.524965

## Sheet: Raw data Fig. S2d-g
male	P7	male	P7		female	P7	female	P7		Mother	male	female	litter size	Body weight of offspring from each mother (male and female)
B6cont1♂	3.8	B6AB1♂	3.3		B6cont1♀	3.7	B6AB1♀	3.1		B6Cont1	6	2	8	3.8	3.9	4	3.7	3.9	3.3	3.7	3.7
B6cont1♂	3.9	B6AB2♂	2.9		B6cont1♀	3.7	B6AB1♀	3		B6Cont3	2	2	4	3	3.4	2.6	2.9
B6cont1♂	4	B6AB2♂	2.6		B6cont3♀	2.6	B6AB1♀	2.9		B6Cont4	4	5	9	3.5	3.9	3.8	3.9	3.4	3.7	3.7	3.3	3.5
B6cont1♂	3.7	B6AB2♂	3.2		B6cont3♀	2.9	B6AB2♀	2.7		B6Cont5	3	1	4	4.5	5	4.7	4.9
B6cont1♂	3.9	B6AB2♂	3.5		B6Cont4♀	3.4	B6AB6♀	3.4		B6cont6	4	3	7	3.9	4	3.9	3.9	3.8	4.1	3.9
B6cont1♂	3.3	B6AB2♂	2.8		B6Cont4♀	3.7	B6AB6♀	3.7		B6cont8	4	2	6	4.2	4.4	4.3	4.3	4.2	4.3
B6cont3♂	3	B6AB6♂	3.5		B6Cont4♀	3.7	B6AB7♀	4		B6cont10	4	2	6	3.9	4	3.8	3.8	3.6	3.7
B6cont3♂	3.4	B6AB6♂	3.5		B6Cont4♀	3.3	B6AB7♀	3.4
B6cont4♂	3.5	B6AB6♂	3.5		B6Cont4♀	3.5	B6AB7♀	3.9	P7	Mother	male	female	litter size	Body weight of offspring from each mother (male and female)
B6cont4♂	3.9	B6AB6♂	3.5		B6cont5♀	4.9	B6AB7♀	3.9		B6AB1	1	3	4	3.3	3.1	3	2.9
B6cont4♂	3.8	B6AB7♂	3.8		B6cont6♀	3.8	Average	3.4		B6AB2	5	1	6	2.9	2.6	3.2	3.5	2.8	2.7
B6cont4♂	3.9	B6AB7♂	3.6		B6cont6♀	4.1	SE	0.124084		B6AB6	4	2	6	3.5	3.5	3.5	3.5	3.4
B6cont5♂	4.5	B6AB7♂	4		B6cont6♀	3.9	SD	0.46428		B6AB7	5	4	9	3.8	3.6	4	4	4	4	3.4	3.9	3.9
B6cont5♂	5	B6AB7♂	4		B6cont8♀	4.2		0.1228
B6cont5♂	4.7	B6AB7♂	4		B6cont8♀	4.3		Student's t test
B6cont6♂	3.9	Average	3.44667		B6cont10♀	3.6
B6cont6♂	4	SE	0.0939918		B6cont10♀	3.7
B6cont6♂	3.9	SD	0.430725		Average	3.70588
B6cont6♂	3.9		0.0023		SE	0.127323
B6cont8♂	4.2		Mann-Whitney U test		SD	0.524965
B6cont8♂	4.4
B6cont8♂	4.3
B6cont8♂	4.3
B6cont10♂	3.9
B6cont10♂	4
B6cont10♂	3.8
B6cont10♂	3.8
Average	3.95185
SE	0.079952
SD	0.415443
Control													AB
litter size	4	5	6	7	8	9	Litter size	Body weight (male)	Littersize	Body weight (female)			litter size	4	5	6	7	8	9	Littersize	Body weight (male)	Littersize	Body weight (female)
	3		4.2	3.9	3.8	3.5	1		1					3.3		2.9			3.8	1		1
	3.4		4.4	4	3.9	3.9	2		2					3.1		2.6			3.6	2		2
	4.5		4.3	3.9	4	3.8	3		3					3		3.2			4	3		3
	5		4.3	3.9	3.7	3.9	4	3	4	2.6				2.9		3.5			4	4	3.3	4	3.1
	4.7		3.9	3.8	3.9	3.4	4	3.4	4	2.9						2.8			4	4		4	3
	2.6		4	4.1	3.3	3.7	4	4.5	4	4.9						3.5			4	4		4	2.9
	2.9		3.8	3.9	3.7	3.7	4	5	4							3.5			3.4	4		4
	4.9		3.8		3.7	3.3	4	4.7	4							3.5			3.9	5		5
			4.2			3.5	4		4							3.5			3.9	6	2.9	6	2.7
			4.3				5		5							2.7				6	2.6	6	3.4
			3.6				6	4.2	6	4.2						3.4				6	3.2	6
			3.7				6	4.4	6	4.3										6	3.5	6
							6	4.3	6	3.6										6	2.8	6
							6	4.3	6	3.7										6	3.5	6
							6	3.9	6											6	3.5	6
							6	4	6											6	3.5	6
							6	3.8	6											6	3.5	6
							6	3.8	6											7		7
							6		6											8		8
							7	3.9	7	3.8										9	3.8	9	4
							7	4	7	4.1										9	3.6	9	3.4
							7	3.9	7	3.9										9	4	9	3.9
							7	3.9	7											9	4	9	3.9
							8	3.8	8	3.7										9	4	9
Average	3.875		4.04167	3.92857	3.75	3.63333	8	3.9	8	3.7			Average	3.075		3.19091			3.84444	9		9
							8	4	8											9		9
	male	P=0.3295	Kruskal Wallis test				8	3.7	8
	female	P=0.2486	Kruskal Wallis test				8	3.9	8
							8	3.3	8
							9	3.5	9	3.4
							9	3.9	9	3.7					male	0.0074		6 vs. 9 -7.444 ** P<0.01
							9	3.8	9	3.7					female	0.0634
							9	3.9	9	3.3
							9		9	3.5

## Sheet: Raw data Fig. S2h-i
	Body weight at P28			Body weight at P28		P28	Mother	male	female	litter size at P7	Body weight at P28 of offspring from each mother						P28	Mother	male	female	litter size at P7	Body weight at P28 of offspring from each mother
B6cont1♂L0R0	16.6		B6AB1♂L0R0	15		Control	B6Cont1	6	2	8	16.6	17.9	18	17.2	16.3	14	AB	B6AB1	1	3	4	15	15.6	13.2
B6cont1♂L0R1	17.9		B6AB2♂L0R1	15.6			B6Cont4	4	5	9	17	16.2	15.5	12.1	14.6			B6AB2	5	1	6	14	15	11.4
B6cont1♂L1R0	18		B6AB2♂L1R0	13.2			B6Cont5	3	1	4	17.6	16.3	17.3					B6AB13	3	2	5	14.6	14.4	14.8
B6cont1♂L1R1	17.2		B6AB2♂L1R1	14			B6cont11	2	6	8	15.6	13.8
B6cont1♂L0R2	16.3		B6AB2♂L0R2	15
B6cont1♂L2R0	14		B6AB2♂L2R0	11.4		Control												AB
B6cont4♂L0R0	17		B6AB13♂L0R0	14.6		litter size	4	5	6	7	8	9	Littersize	Body weight (male)				litter size	4	5	6	7	8	9	Littersize	Body weight (male)
B6cont4♂L0R1	16.2		B6AB13♂L0R1	14.4			17.6				16.6	17	1						15	14.6	14				1
B6cont4♂L1R0	15.5		B6AB13♂L1R0	14.8			16.3				17.9	16.2	2						15.6	14.4	15				2
B6cont4♂L1R1	12.1		Average	14.2222			17.3				18	15.5	3						13.2	14.8	11.4				3
B6cont4♂L0R2	14.6		SE	0.419582							17.2	12.1	4	17.6											4	15
B6cont5♂L0R0	17.6		SD	1.25875							16.3	14.6	4	16.3				Average	14.6		13.4667				4	15.6
B6cont5♂L0R1	16.3		vsP28Control	0.0095							14		4	17.3											4	13.2
B6cont5♂L1R0	17.3										15.6		4												4
B6cont11♂L0R0	15.6										13.8		5												5	14.6
Average	16.1467												6												5	14.4
SE	0.414828					Average	17.0667				16.175	15.08	6												5	14.8
SD	1.60662												6												6	14
													6												6	15
													6												6	11.4
													6												6
													6												6
													6												6
													6												6
													7												7
													7												8
													7												8
													7												8
													8	16.6											8
													8	17.9											8
													8	18											8
													8	17.2											8
													8	16.3											8
													8	14											9
													8	15.6											9
													8	13.8											9
													9	17											9
													9	16.2											9
													9	15.5											9
													9	12.1
													9	14.6
													9
