# Supplementary material for: Administration of Non-Absorbable Antibiotics to Pregnant Mice to Perturb the Maternal Gut Microbiota Is Associated with Alterations in Offspring Behavior
Source: PLoS One. 2016 Jan 20;11(1):e0138293. doi: 10.1371/journal.pone.0138293 (PMC4720425; doi:10.1371/journal.pone.0138293)
Supplement: S3 Data — (XLSX) [file pone.0138293.s003.xlsx]

## Sheet: Raw data Fig. 4a
		12	13	14	15	16	17	18	19	20	21	22	23	0	1	2	3	4	5	6	7	8	9	10	11	12	13	14	15	16	17	18	19			12	13	14	15	16	17	18	19	20	21	22	23	0	1
	B6cont1 L0R0	1447.9	97.7	472.9	355.4	195.9	284.4	904.9	133.3	2452.4	5558.6	4271.9	2744.7	2361.5	2444.8	539.6	328.2	682.3	2493.5	1126.7	1964.1	342.7	538.3	1385	498.8	1447.9	97.7	472.9	355.4	195.9	284.4	904.9	133.3		B6AB1 L0R0	888.9	267.9	332.5	107.8	533.1	135.7	77	483.3	216.5	1941.4	2366.8	1268.9	646.1	183.9
	B6cont1 L0R1	405.3	1037.8	188.5	569.4	266.9	696	631.1	465.5	1584	2956.4	2595.7	943.2	2290.7	2211.2	1556.9	272.4	509.8	1072.4	1606.5	1101.8	292.4	482.9	457.8	1733.6	405.3	1037.8	188.5	569.4	266.9	696	631.1	465.5		B6AB2 L0R1	144.1	252.7	448.1	129.4	231.9	421.4	384.6	424.3	2000.8	2381.6	3064.4	3067.2	1627.6	1092.1
	B6cont1 L1R0	725.4	164.2	208.7	397.1	116.4	329.1	172.1	877.4	4355.5	2896.9	3278.7	2086.8	2392.1	151.8	425.4	1525.8	454.9	2150.8	3155.5	3527.6	937.6	179	680.1	877.1	725.4	164.2	208.7	397.1	116.4	329.1	172.1	877.4		B6AB2 L1R0	202.3	418.9	295.6	224.3	157.8	293	398.4	320.4	1018.6	5104.4	4773.2	2583.7	1047.4	119.6
	B6cont1 L1R1	314.7	453.8	356.7	108.7	988.5	466.4	430.7	900.7	939	2950.8	3673.3	774.5	452.2	1549.9	1455.3	232.1	455.4	1560.7	1718.2	482.6	163.1	885	141.1	436.6	314.7	453.8	356.7	108.7	988.5	466.4	430.7	900.7		B6 AB2 L1R1 4w	782.3	225.7	1379.4	981.9	240.2	207.1	1309	86.1	1169.4	191.9	182.7	921	1024.8	721.5
	B6cont4 L0R2	1885.1	973.5	243.5	113.1	482.8	122.5	474	660.3	1941.6	3974.7	2548.6	413.9	1861.8	2118.2	1543.1	116.7	203.8	1577.9	1327	1063.5	318.8	499.4	157.2	146.6	1885.1	973.5	243.5	113.1	482.8	122.5	474	660.3		B6 AB2 L0R2 4w	1436.7	195.6	768.1	154.6	785.6	167.1	1510.5	248.1	221.7	635.6	692	541.9	489.3	1873.6
	B6 cont4 L0R0 4w	848	1431.4	103.9	1470.9	429.5	348.7	435.6	907.4	180.8	263.1	541.6	1167.1	1586.4	2573.9	2996.2	2450.3	2931	785.7	208.3	998.5	189.2	200.8	1698.8	401.5	848	1431.4	103.9	1470.9	429.5	348.7	435.6	907.4		B6 AB2 L2R0 4w	172.7	1502.7	1291.4	129.9	108.8	1761.9	101.7	812.3	3779.8	7018.6	1760.1	1449.4	1696.1	2418.5
	B6 cont4 L0R1 4w	1384.1	369.3	715.8	260.7	2652.2	192.7	213.4	1360.7	289.3	704.1	925.2	1363.6	1070.2	2311.2	2875.5	2397.1	4065.9	326.6	792.1	259.6	195.1	523.8	961.2	158	1384.1	369.3	715.8	260.7	2652.2	192.7	213.4	1360.7		B6AB6L0R0 4w	500.1	95.7	203	160.9	461.9	197.5	153.5	639.5	2670.2	1627.9	1980.7	1379.5	1687	366.4
	B6 cont4 L1R0 4w	1226.2	633	1133	366	2124.2	675.8	206.5	1357.4	474.3	664	1377	1053.7	1785.3	1858.1	1268.9	2127.8	1284.2	565.2	1036.4	1354.1	277.9	552	1133.2	947.5	1226.2	633	1133	366	2124.2	675.8	206.5	1357.4		B6AB6L0R1 4w	111.8	281.5	214.7	113.4	1241.2	105.8	354.7	353.9	1875.7	2717.9	1445.9	1460.5	1540	1168.4
	B6 cont4 L1R1 4w	506.4	634.4	208.7	1038.8	1293.8	161.3	567.2	135.7	1320.5	1986.7	165.4	1285.8	3252.4	2097.6	2693.8	2984.7	1794	2228.7	100	372.4	1481.2	310.8	129.5	1791.5	506.4	634.4	208.7	1038.8	1293.8	161.3	567.2	135.7		B6AB6L1R0 4w	682.9	798.5	507.4	116.9	933.9	126.6	174.2	779.8	2520.3	2306.3	1402.5	1579.3	1390.2	282.8
	B6 cont5 L0R0 4w	119.9	1669.9	136.5	479.1	528.5	231.4	1482.3	493.4	1379.1	211.8	1234.4	2101.7	3823.8	2986.8	2182.4	1530.9	237.7	1208.4	1656.6	683	196.2	1402.2	696.5	518.3	119.9	1669.9	136.5	479.1	528.5	231.4	1482.3	493.4		B6AB6L1R1 4w	604.9	1062.6	157.4	127	101.2	1613.4	101.9	1022.5	1825.7	1689.2	495.7	846.8	1836.5	81.2
	B6cont1 L0R2 4w	101.9	2112.2	300.1	105.3	674.8	603.6	123.3	1040.8	597.4	212.9	1198	2384.3	516.5	3007.4	3512.4	2333.2	2428.1	156.7	575.7	485.1	611.3	1196.8	2030.4	269.9	101.9	2112.2	300.1	105.3	674.8	603.6	123.3	1040.8		B6AB7 L0R0 4w	807.4	82.1	130.3	574.8	190.6	325.2	1029	127.3	2901.7	3718.2	3153.1	1963.7	1147.1	470.4
	B6cont1 L2R0 4w	2585.4	842.1	590	782.7	1648.5	711	258.1	445.5	2244.3	566.3	1674.2	2398.4	3579.5	3079.3	1263.6	478.4	1206	3702.2	3081.6	712.6	536.1	670.3	1123.4	1184.3	2585.4	842.1	590	782.7	1648.5	711	258.1	445.5		B6AB7 L0R1 4w	2334	133	201.6	1235.7	80.7	117.4	1365.4	166.1	2328.2	2564.5	2135.2	435.3	1950.2	2656.1
	B6cont3 L0R0 4w	121.1	355	225.4	1050.6	707.4	127.6	418.2	409.8	2354.1	3775.5	5463.5	847.1	2379.8	700.7	338.4	231.1	1845.8	1931.1	1621.9	1686.7	254.5	986.9	272.1	1043.3	121.1	355	225.4	1050.6	707.4	127.6	418.2	409.8		B6AB7 L1R0 4w	1254	1015.9	301.4	105.3	1072.4	263	303.4	382.8	2083.9	3144.4	1964.6	2561.6	3363.8	216.2
	B6cont3 L0R1 4w	748.9	129	432.9	1085.7	123.2	115.7	1370.1	132.5	448	993.9	1858.5	3203.9	2672.7	459.4	875	875	2250.7	2453.8	946.4	164.6	250.2	863.7	810.5	182.4	748.9	129	432.9	1085.7	123.2	115.7	1370.1	132.5		B6AB7 L1R1 4w	680.7	1138.3	416.8	115.6	894.6	142.3	735.8	405.8	1783.2	5128.1	3449.5	3048.1	1455.6	1847.6
	B6cont5 L0R1 4w	766.9	111.8	504.1	124.7	1371.6	180.5	170.4	782.1	697.9	3618.1	3074.8	1568.7	2138.5	645.9	946.3	661.8	676.5	1619.6	2992.8	3571.3	841.2	129.2	1404.7	196.8	766.9	111.8	504.1	124.7	1371.6	180.5	170.4	782.1		B6AB7 L0R2 4w	162.5	643.2	269.9	602.2	242.9	575.9	256.9	396.7	2647.9	4129	2525.4	1825.2	357.7	1357.7
	B6cont5 L1R0 4w	338	425.2	522.5	92.2	173.2	838.7	144.3	892.3	1458	4353	4678.4	2795.8	549.7	982.9	3027.5	1760.9	419.9	169.9	2279.8	254	174.1	154.2	2121.4	338.7	338	425.2	522.5	92.2	173.2	838.7	144.3	892.3		B6 AB13 L0R0 P31	636	829.4	145.1	740.4	587.6	574.6	553.3	883.3	11548.9	5903.5	5583.9	3725.1	8244.1	4739.6
	B6Cont8L0R0 4w	672.1	184.7	130.2	919.3	453	191.9	550.9	201.1	3587.3	3528	1665.2	908.6	1649.4	2686.5	2345.9	148.4	178.1	867.9	1365.2	1883.5	553	167.3	109.8	1857.1	672.1	184.7	130.2	919.3	453	191.9	550.9	201.1		B6 AB13 L0R1 P31	385.2	462.2	850.5	160.1	886.7	213.1	748.6	501	1691.1	3050.6	2004.4	2501.5	2994.3	1357.2
	B6Cont8L0R1 4w	1116.6	304.3	635	246	293.3	1060.4	802.5	945.6	1790.5	3864.9	1854.8	814.7	2348.3	2767.7	918.4	275.9	813	1133.4	1890.4	1096	356.9	312	2421.8	420.9	1116.6	304.3	635	246	293.3	1060.4	802.5	945.6		B6 AB13 L1R0 P31	1030.1	414	510.7	840.4	226.5	1337.4	536	1012.4	4020.6	5755.6	3318.7	2665.6	753.6	1765.4
	B6Cont8L1R0 4w	476.9	630.5	323.5	680.6	153.5	163.9	1019.6	554.6	6795.1	7629.2	8865.2	9896.7	10570.3	7943.9	7855.6	8299.1	2313.5	4670.9	5687.5	5867.9	293.7	671.6	667.4	572.1	476.9	630.5	323.5	680.6	153.5	163.9	1019.6	554.6		Average	712.033	545.55	467.994	367.811	498.756	476.578	560.772	502.533	2572.46	3278.26	2349.93	1879.13	1847.3	1262.12
	B6Cont8L1R1 4w	158.6	165.7	796.8	145.4	409	206.4	110.2	882.1	1497.9	3604.7	2118	1166.1	1776.8	724.3	159.5	663.9	1158.3	209.3	1273.1	1625.5	169.7	296.5	113.9	1108	158.6	165.7	796.8	145.4	409	206.4	110.2	882.1		SE	131.637	98.9344	88.3141	85.5878	89.3567	124.496	108.829	68.9723	579.569	446.044	328.703	222.082	418.555	280.266
	B6Cont6 L0R0 4w	1320.4	117.8	445.9	102.8	582.8	568.3	628.1	550.5	2960	4060.6	3219.2	2737.9	1077.5	633.3	328.2	265.9	1890.8	2386.5	3422.6	2227	102.5	168.1	719.6	147.2	1320.4	117.8	445.9	102.8	582.8	568.3	628.1	550.5		SD	558.489	419.743	374.685	363.118	379.108	528.193	461.722	292.625	2458.9	1892.41	1394.57	942.216	1775.78	1189.07
	B6Cont6 L0R1 4w	1513.7	504.2	1482.1	925.8	1235.7	372.6	744.3	589	2371.4	3467.1	3110.8	578.4	2468.2	279.3	289.8	1269.2	2355.5	1184.7	1474.6	1816.8	364.9	397.9	495.6	1538.7	1513.7	504.2	1482.1	925.8	1235.7	372.6	744.3	589															0.0645	0.043
	B6Cont6 L1R0 4w	567.1	1242.8	655.8	140	1292.2	263.9	450.9	1021.3	8093.1	6032.9	8277.3	8513	3877	1147.2	1661.1	6768.2	4277.9	4291.5	3826.9	3298.7	447	272.3	387.7	927.8	567.1	1242.8	655.8	140	1292.2	263.9	450.9	1021.3															Mann-Whitney test	Mann-Whitney test
	B6 cont10 L0R0 4w	1089.4	89.2	155.2	1641	166.6	84.1	666.1	159.1	569.2	2014.9	1674.2	1620.7	1394.9	1709.2	1251.6	495.9	167.7	813.1	1482.6	2685	1254.2	286.9	184.6	281.9	1089.4	89.2	155.2	1641	166.6	84.1	666.1	159.1
	B6 cont10 L0R1 4w	1934.7	329.4	706.4	489.6	904.1	220.4	496.7	1415.5	394.4	1412.7	2141	3210.6	1769.2	1072.3	1187.7	1266.1	550.7	1443.7	1904.5	2358.6	1937.9	673.2	321.1	1046.3	1934.7	329.4	706.4	489.6	904.1	220.4	496.7	1415.5
	B6 cont10 L1R0 4w	2234	181.6	832	171.1	423.4	139.8	218.7	1485.6	692.4	1213.7	2304.5	3048.4	2328.1	1836.8	3111.1	1928	2410.7	4704.7	6520	3192.2	335.5	195	979.5	241.4	2234	181.6	832	171.1	423.4	139.8	218.7	1485.6
	B6 cont10 L1R1 4w	95	584.4	266.7	221	601.9	174.9	556.8	246.2	998.7	589.6	1831.4	2842.2	1373.5	1292.3	674.6	166.8	1167.9	737	1509.1	558.9	288.9	954.6	193.8	170.5	95	584.4	266.7	221	601.9	174.9	556.8	246.2
	B6 Cont11 L0R0 P31	1592.6	1350	108.4	1053.6	134	2563.5	135.4	1668.7	4481.7	7924	6154.4	2507.3	3346.1	1967.5	122.1	1105.6	2274.2	313.6	1850.8	112.9	642.6	889.5	982.4	1016.4	1592.6	1350	108.4	1053.6	134	2563.5	135.4	1668.7
	B6 Cont11 L0R1 P31	1399.1	241.1	366.1	442.1	2148.9	212.7	2355.3	565.9	4466.5	7819.4	4281.3	1573.2	958.3	2945.4	1119.5	451.4	2949.8	501.4	2045.4	1213.6	305	440.9	395.3	2321.2	1399.1	241.1	366.1	442.1	2148.9	212.7	2355.3	565.9
	Average	955.014	598.828	456.803	537.197	778.476	424.421	577.162	733.793	2117.74	3063.74	2967.47	2294.86	2332.78	1937.41	1673.29	1496.92	1515.66	1629.69	2016.49	1607.52	486.669	527.624	799.152	771.531	955.014	598.828	456.803	537.197	778.476	424.421	577.162	733.793
	SE	127.029	98.5571	60.0475	82.0148	126.936	89.4533	91.122	81.5905	361.627	427.314	390.683	390.915	342.257	272.377	288.023	349.312	214.199	244.873	269.028	247.157	79.8229	63.1093	120.569	113.168	127.029	98.5571	60.0475	82.0148	126.936	89.4533	91.122	81.5905
	SD	684.073	530.746	323.366	441.663	683.569	481.721	490.707	439.378	1947.42	2301.16	2103.89	2105.14	1843.11	1466.8	1551.05	1881.1	1153.5	1318.68	1448.76	1330.98	429.859	339.854	649.286	609.429	684.073	530.746	323.366	441.663	683.569	481.721	490.707	439.378
Time	12	13	14	15	16	17	18	19	20	21	22	23	0	1	2	3	4	5	6	7	8	9	10	11
Control	955.014	598.828	456.803	537.197	778.476	424.421	577.162	733.793	2117.74	3063.74	2967.47	2294.86	2332.78	1937.41	1673.29	1496.92	1515.66	1629.69	2016.49	1607.52	486.669	527.624	799.152	771.531
AB	712.033	545.55	467.994	367.811	498.756	476.578	560.772	502.533	2572.46	3278.26	2349.93	1879.13	1847.3	1262.12	1149.04	1427.11	928.478	1451.21	2015.78	2021.53	528.883	480.139	590.933	1003.56
Control	127.029	98.5571	60.0475	82.0148	126.936	89.4533	91.122	81.5905	361.627	427.314	390.683	390.915	342.257	272.377	288.023	349.312	214.199	244.873	269.028	247.157	79.8229	63.1093	120.569	113.168
AB	131.637	98.9344	88.3141	85.5878	89.3567	124.496	108.829	68.9723	579.569	446.044	328.703	222.082	418.555	280.266	248.797	400.751	167.13	186.74	318.116	305.252	100.294	117.653	133.207	211.061
[truncated: 18 more columns]

## Sheet: Raw data Fig. 4c-e
	Locomotion 0-30(A+B+C)	Locomotion 30-60 (A+B+C)	Locomotion 60-90 (A+B+C)	Locomotion 90-120 (A+B+C)	Locomotion 0-30(A+B)	Locomotion 30-60 (A+B)	Locomotion 60-90 (A+B)	Locomotion 90-120 (A+B)	Locomotion 0-30(A)	Locomotion 30-60 (A)	Locomotion 60-90 (A)	Locomotion 90-120 (A)			Locomotion 0-30(A+B+C)	Locomotion 30-60 (A+B+C)	Locomotion 60-90 (A+B+C)	Locomotion 90-120 (A+B+C)	Locomotion 0-30(A+B)	Locomotion 30-60 (A+B)	Locomotion 60-90 (A+B)	Locomotion 90-120 (A+B)	Locomotion 0-30(A)	Locomotion 30-60 (A)	Locomotion 60-90 (A)	Locomotion 90-120 (A)
B6cont1♂L2R0	10725	6540	5021	4175	1395	1257	941	897	81	54	59	74		B6AB2♂L1R1	9102	4372	932	550	573	221	13	5	10	0	0	0
B6cont4♂L0R0	15259	11560	7395	8787	2900	3236	2168	2449	129	176	161	211		B6AB2♂L0R2	14893	8078	6464	6610	748	581	578	685	1	3	9	11
B6cont4♂L0R1	12063	9650	6971	7382	461	423	467	491	14	0	0	0		B6AB2♂L2R0	9012	4914	88	0	805	779	0	0	23	27	0	0
B6cont4♂L1R0	11813	8767	8379	6716	629	544	696	421	1	2	1	0		B6AB1♂L0R0	14250	8875	7185	3352	694	660	690	297	0	1	20	0
B6cont1♂L0R2	15573	11945	9927	8886	2772	2544	2124	1723	136	185	86	101		B6AB2♂L0R1	12541	8216	5696	3029	601	959	692	208	9	18	3	0
B6cont3♂L0R0	10298	4667	5146	4	616	252	435	0	0	0	8	0		B6AB2♂L1R0	9404	5922	4263	1462	238	302	299	107	0	15	8	6
B6cont3♂L0R1	10341	6518	4554	4472	510	690	618	445	0	4	13	4		B6 AB7 ♂L0R0	11243	4592	1482	3	1079	723	143	0	31	44	0	0
B6cont5♂L0R1	11686	7453	6004	5546	1190	1184	1005	1172	56	25	12	27		B6AB7♂L0R1	8565	4633	2882	314	716	432	320	0	10	0	0	0
B6cont5♂L1R0	15940	14898	10266	10482	2130	2802	1929	1847	100	146	78	25		B6AB7♂L1R0	9471	6608	4970	287	669	413	408	0	9	11	2	0
B6cont1♂L0R0	10707	7431	5416	1528	982	1450	813	437	14	156	49	42		B6AB7♂L1R1	8667	5502	2717	1285	1048	568	162	119	17	9	2	0
B6cont1♂L0R1	9511	6890	3135	1809	587	612	428	157	0	30	9	0		B6AB7♂L0R2	12398	9170	5781	2172	685	941	428	167	12	16	0	2
B6cont1♂L1R0	12364	8377	5908	94	531	619	594	0	3	0	7	0		B6AB6♂L0R0	11226	7766	3648	1302	1133	1225	577	312	134	55	26	0
B6cont1♂L1R1	12759	9573	7415	3917	1031	1315	829	485	36	23	27	8		B6AB6♂L0R1	10473	2455	1514	3721	389	160	74	171	3	4	0	4
B6cont6♂L0R0	11938	8108	8006	1813	2028	1510	1482	283	131	62	85	13		B6AB6♂L1R0	11112	5599	1371	2890	360	446	138	150	2	0	0	0
B6cont6♂L0R1	10328	7779	2449	38	946	677	212	0	8	5	11	0		B6AB6♂L1R1	10883	6169	4067	887	694	434	385	95	11	8	14	0
B6cont6♂L1R0	12783	6026	5313	4873	483	647	446	391	6	6	7	5		B6AB13♂L0R0	11319	5371	2321	8	527	147	102	0	9	0	0	0
B6cont8♂L0R0	10039	6535	6582	4969	1483	2044	1792	1162	163	71	118	128		B6AB13♂L0R1	9415	5107	4931	3151	461	357	448	171	3	0	10	0
B6cont8♂L0R1	7615	5800	3281	2387	501	752	333	126	8	34	11	4		B6AB13♂L1R0	10177	6946	1327	1329	917	870	159	49	34	35	0	0
B6cont8♂L1R0	16218	9761	7780	2868	875	981	529	160	0	1	8	0
B6cont8♂L1R1	9708	6021	3617	2635	1246	1256	650	438	60	79	4	31
B6 Cont11♂ L0R0	14992	9130	9577	8935	1945	1170	1857	2276	48	20	115	93		Average	10786.2	6127.5	3424.39	1797.33	685.389	567.667	312	140.889	17.6667	13.6667	5.22222	1.27778
B6 Cont11 ♂L0R1	11880	6825	7544	6593	1289	1471	1684	1619	68	100	109	63		SE	430.614	418.207	496.108	409.528	58.5519	71.0976	53.2361	39.8805	7.23192	3.89821	1.84631	0.694542
Average	12024.5	8193.36	6349.36	4495.86	1205.91	1247.09	1001.45	771.773	48.2727	53.5909	44.4545	37.6818		SD	1826.94	1774.3	2104.81	1737.48	248.415	301.642	225.862	169.199	30.6824	16.5387	7.83323	2.94669
SE	495.397	507.165	471.447	667.752	156.779	168.637	136.998	162.082	11.3664	13.1099	10.3687	11.6153			0.0734	0.0041	0.0001	0.0016	0.0045	0.0011	< 0.0001	0.0012	0.2101	0.0356	0.0004	0.0009
SD	2323.62	2378.82	2211.28	3132.03	735.357	790.978	642.575	760.234	53.3133	61.4907	48.6334	54.4806			Unpaired t test	Unpaired t test	Unpaired t test	Welch's	Welch's	Mann-Whitney	Mann-Whitney	Mann-Whitney	Mann-Whitney	Mann-Whitney	Mann-Whitney	Mann-Whitney
Locomotor activity in area (A+B+C)	0-30	30-60	60-90	90-120		Locomotor activity in area (A+B)	0-30	30-60	60-90	90-120		Locomotor activity in area A	0-30	30-60	60-90	90-120
Control	12024.5	8193.36	6349.36	4495.86		Control	1205.91	1247.09	1001.45	771.773		Control	48.2727	53.5909	44.4545	37.6818
AB	10786.2	6127.5	3424.39	1797.33		AB	685.389	567.667	312	140.889	13.6667	AB	17.6667	13.6667	5.22222	1.27778
Control SE	495.397	507.165	471.447	667.752		Control SE	156.779	168.637	136.998	162.082		Control SE	11.3664	13.1099	10.3687	11.6153
AB SE	430.614	418.207	496.108	409.528		AB SE	58.5519	71.0976	53.2361	39.8805	3.89821	AB SE	7.23192	3.89821	1.84631	0.694542

## Sheet: Raw data Fig. 4f
	Rearing 30 (A+B+C)	Rearing 60 (A+B+C)	Rearing 120 (A+B+C)				Rearing 30 (A+B+C)	Rearing 60 (A+B+C)	Rearing 120 (A+B+C)
B6cont1♂L2R0	81	145	216			B6AB2♂L1R1	132	189	203
B6cont4♂L0R0	196	318	521			B6AB2♂L0R2	68	127	213
B6cont4♂L0R1	96	262	506			B6AB2♂L2R0	104	148	148
B6cont4♂L1R0	159	308	552			B6AB1♂L0R0	182	303	395
B6cont1♂L0R2	183	294	521			B6AB2♂L0R1	144	291	404
B6cont3♂L0R0	82	112	157			B6AB2♂L1R0	54	110	149
B6cont3♂L0R1	113	255	452			B6 AB7♂ L0R0	213	273	294
B6cont5♂L0R1	166	337	577			B6AB7♂L0R1	99	166	218
B6cont5♂L1R0	126	329	652			B6AB7♂L1R0	172	334	478
B6cont1♂L0R0	120	216	273			B6AB7♂L1R1	134	240	317
B6cont1♂L0R1	113	235	314			B6AB7♂L0R2	152	260	348
B6cont1♂L1R0	115	224	310			B6AB6♂L0R0	139	245	312
B6cont1♂L1R1	169	319	465			B6AB6♂L0R1	138	160	265
B6cont6♂L0R0	153	299	439			B6AB6♂L1R0	116	171	221
B6cont6♂L0R1	108	203	227			B6AB6♂L1R1	138	249	312
B6cont6♂L1R0	124	181	344			B6AB13♂L0R0	132	191	218
B6cont8♂L0R0	61	215	398			B6AB13♂L0R1	135	208	309
B6cont8♂L0R1	77	227	293			B6AB13♂L1R0	126	214	259
B6cont8♂L1R0	176	379	565
B6cont8♂L1R1	124	253	364
B6 Cont11♂ L0R0	155	290	558			Average	132.111	215.5	281.278
B6 Cont11 ♂L0R1	85	119	177			SE	8.79761	14.8707	20.9022
Average	126.455	250.909	403.682			SD	37.3251	63.0912	88.6804
SE	8.158	15.2403	30.821				0.6409	0.1089	0.0023
SD	38.2644	71.4835	144.563				Unpaired t test	Unpaired t test	Welch's
	Control	AB
Average	403.682	281.278
SE	30.821	20.9022

## Sheet: Raw data Fig. S3a
	Locomotion 120 (A+B+C)			Locomotion 120 (A+B+C)
B6cont1♂L2R0	26461		B6AB2♂L1R1	14956
B6cont4♂L0R0	43001		B6AB2♂L0R2	36045
B6cont4♂L0R1	36066		B6AB2♂L2R0	14014
B6cont4♂L1R0	35675		B6AB1♂L0R0	33662
B6cont1♂L0R2	46331		B6AB2♂L0R1	29482
B6cont3♂L0R0	20115		B6AB2♂L1R0	21051
B6cont3♂L0R1	25885		B6 AB7♂ L0R0	17320
B6cont5♂L0R1	30689		B6AB7♂L0R1	16394
B6cont5♂L1R0	51586		B6AB7♂L1R0	21336
B6cont1♂L0R0	25082		B6AB7♂L1R1	18171
B6cont1♂L0R1	21345		B6AB7♂L0R2	29521
B6cont1♂L1R0	26743		B6AB6♂L0R0	23942
B6cont1♂L1R1	33664		B6AB6♂L0R1	18163
B6cont6♂L0R0	29865		B6AB6♂L1R0	20972
B6cont6♂L0R1	20594		B6AB6♂L1R1	22006
B6cont6♂L1R0	28995		B6AB13♂L0R0	19019
B6cont8♂L0R0	28125		B6AB13♂L0R1	22604
B6cont8♂L0R1	19083		B6AB13♂L1R0	19779
B6cont8♂L1R0	36627
B6cont8♂L1R1	21981
B6 Cont11♂ L0R0	42634		Average	22135.4
B6 Cont11 ♂L0R1	32842		SE	1470.78
Average	31063.1		SD	6240.01
SE	1909.6			0.001
SD	8956.79			Unpaired t test
	Locomotion 120 (A+B+C)
	Control	AB
Average	31063.1	22135.4
SE	1909.6	1470.78

## Sheet: Raw data Fig. S3b
	Time spent 120 （A+B)			Time spent 120 （A+B)
B6cont1♂L2R0	7256		B6AB2♂L1R1	1339
B6cont4♂L0R0	13924		B6AB2♂L0R2	6329
B6cont4♂L0R1	3438		B6AB2♂L2R0	3807
B6cont4♂L1R0	5392		B6AB1♂L0R0	3830
B6cont1♂L0R2	14029		B6AB2♂L0R1	8821
B6cont3♂L0R0	1523		B6AB2♂L1R0	1003
B6cont3♂L0R1	10289		B6 AB7♂ L0R0	1479
B6cont5♂L0R1	7404		B6AB7♂L0R1	2650
B6cont5♂L1R0	6631		B6AB7♂L1R0	2922
B6cont1♂L0R0	5227		B6AB7♂L1R1	3740
B6cont1♂L0R1	2824		B6AB7♂L0R2	3615
B6cont1♂L1R0	2700		B6AB6♂L0R0	3105
B6cont1♂L1R1	5108		B6AB6♂L0R1	922
B6cont6♂L0R0	6098		B6AB6♂L1R0	1601
B6cont6♂L0R1	2449		B6AB6♂L1R1	1830
B6cont6♂L1R0	7681		B6AB13♂L0R0	538
B6cont8♂L0R0	10687		B6AB13♂L0R1	3329
B6cont8♂L0R1	3861		B6AB13♂L1R0	2153
B6cont8♂L1R0	4854
B6cont8♂L1R1	4811
B6 Cont11♂ L0R0	7382		Average	2945.17
B6 Cont11 ♂L0R1	8669		SE	481.383
Average	6465.32		SD	2042.34
SE	732.56			0.0004
SD	3436.01			Mann-Whitney test
	Control	AB
Average	6465.32	2945.17
SE	732.56	481.383
