# Supplementary material for: Administration of Non-Absorbable Antibiotics to Pregnant Mice to Perturb the Maternal Gut Microbiota Is Associated with Alterations in Offspring Behavior
Source: PLoS One. 2016 Jan 20;11(1):e0138293. doi: 10.1371/journal.pone.0138293 (PMC4720425; doi:10.1371/journal.pone.0138293)
Supplement: S4 Data — (XLSX) [file pone.0138293.s004.xlsx]

## Sheet: Raw data Fig.5a
	B6cont1♂L0R0	24.5		B6AB1♂L0R0	25.9
	B6cont1♂L0R1	27.4		B6AB2♂L0R1	27.1
	B6cont1♂L1R0	28		B6AB2♂L1R0	27.1
	B6cont1♂L1R1	27.7		B6AB2♂L1R1	26.4
	B6cont1♂L0R2	26.7		B6AB2♂L0R2	25.4
	B6cont1♂L2R0	27.6		B6AB2♂L2R0	23.9
	B6cont3♂L0R0	25.4		B6AB6♂L0R0	25.6
	B6cont3♂L0R1	26		B6AB6♂L0R1	26.4
	B6cont4♂L0R0	26.4		B6AB6♂L1R0	24.4
	B6cont4♂L0R1	25.5		B6AB6♂L1R1	26
	B6cont4♂L1R0	26.3		B6AB7♂L0R0	26
	B6cont4♂L0R2	27.5		B6AB7♂L0R1	26
	B6cont5♂L0R0	27		B6AB7♂L1R0	27.2
	B6cont5♂L0R1	28.8		B6AB7♂L1R1	27.1
	B6cont5♂L1R0	29.3		B6AB7♂L0R2	27.1
	B6cont6♂L0R0	24.9		B6AB13♂L0R0	23.2
	B6cont6♂L0R1	25.5		B6AB13♂L0R1	24.3
	B6cont6♂L1R0	27.5		B6AB13♂L1R0	23.4
	B6cont8♂L0R0	27
	B6cont8♂L0R1	26.6
	B6cont8♂L1R0	25.9
	B6cont8♂L1R1	27
	B6cont10♂L0R0	27
	B6cont10♂L0R1	26.8
	B6cont10♂L1R0	28.2
	B6cont10♂L1R1	28.5
	B6cont11♂L0R0	25.7
	B6cont11♂L0R1	25.6
	Average	26.7964		Average	25.6944
	SE	0.22505		SE	0.312639
	SD	1.19085		SD	1.32642
					0.0054
					Unpaired t test
		Control	AB
	Average	26.7964	25.6944
	SE	0.22505	0.312639

## Sheet: Raw data Fig. 5b
		12	13	14	15	16	17	18	19	20	21	22	23	0	1	2	3	4	5	6	7	8	9	10	11	12	13	14	15	16	17	18	19							12	13	14	15	16	17	18	19	20	21
B6cont1 L0R0 8w		536.9	155.8	383.9	291.3	371.9	281	171.1	738.4	1144.9	3891.4	3903.4	1579.4	256	4790.3	2220.9	1842.3	989.3	1202.3	2862.3	236.2	1066.8	388.9	1749	1068.5	536.9	155.8	383.9	291.3	371.9	281	171.1	738.4					B6AB1 L0R0 8w		574.2	71	1139.6	85.7	481.8	129.3	313.4	167.6	1625	2243
B6cont1 L0R1 8w		982	423.9	428.1	1155.6	214.2	457	1081.9	352	1013.7	1303.8	2518.2	2834.3	1600.2	705.6	1651.2	1336.5	647.3	1746.2	4048.9	3403.8	3397.7	391.7	1106.4	216.5	982	423.9	428.1	1155.6	214.2	457	1081.9	352					B6AB2 L0R1 8w		417.4	86.1	498.1	85.9	132	841.5	105.1	514.2	1909.9	7096.4
B6cont1 L1R0 8w		161.3	425.7	209	470.5	1237.3	147.1	406.2	417.8	836.5	1721.5	2896	1622.4	2769.4	2015	291.4	882.7	205.2	1314.3	2705.2	265.8	630.1	148.1	1669.8	616.8	161.3	425.7	209	470.5	1237.3	147.1	406.2	417.8					B6AB2 L1R0 8w		222	113.7	575.6	475.8	1018.2	141.6	351.8	271.7	4503.8	3994.6
B6cont1 L1R1 8w		459.4	163.9	501.2	153.6	347.5	212.2	384.6	163.6	909.1	2301.7	2756.7	817.5	2014.4	1218.6	380.9	839.6	370.3	2808.8	3954.3	1526.2	948.1	94.3	623.2	113.8	459.4	163.9	501.2	153.6	347.5	212.2	384.6	163.6					B6AB2 L1R1 8w		985.8	93	872.6	70.1	451.8	104	400.2	535.8	1002.5	6348.8
B6cont4 L0R2 8w		812.5	1204.3	125.5	200.6	418.7	127.9	322.8	173.4	2149.1	4506.2	3354.2	3000.3	1773.6	929.4	1297.7	2278.3	148.3	753.2	1886.4	2525.5	91.1	591.7	290.2	132.8	812.5	1204.3	125.5	200.6	418.7	127.9	322.8	173.4					B6AB2 L0R2 8w		1030.9	252.6	897.5	149.1	412.3	145.3	1662.7	148.5	1115.1	2836.2
B6cont4 L0R0 8w		1200.5	124.8	739.1	425.8	696.8	102.2	377.4	336.4	354.3	2667.4	2633.3	1094.3	2549.2	3243.5	153.7	493.2	181	1127.5	1322.2	137.8	119.3	737.8	116.6	143.2	1200.5	124.8	739.1	425.8	696.8	102.2	377.4	336.4					B6AB2 L2R0 8w		139.7	90.4	614.2	170.3	95.6	815	234.6	118	2023	4207.9
B6cont4 L0R1 8w		212	1466.8	287.2	226.9	474.9	205.8	468.1	468.1	1002.9	1901.2	1611	1799.7	782	526	1256.3	272.7	1440.8	637	1544.4	224.9	246.6	828.6	231.8	497.3	212	1466.8	287.2	226.9	474.9	205.8	468.1	468.1					B6AB7 L0R0 P56		807	108.2	715.3	114.6	452.6	790.6	111.8	630.3	1983.7	7247.5
B6cont4 L1R0 8w		298.2	310.6	344.4	306.7	298.1	372.1	709.6	235.3	1316.8	2696.8	4032.8	3177.5	358.6	2520.2	1539.6	948.3	1264	1916.5	2335.5	890.9	343.6	1447.1	505.2	924.9	298.2	310.6	344.4	306.7	298.1	372.1	709.6	235.3					B6AB7 L0R1 P56		727.4	136	117.5	1150.8	320.4	644.6	113.3	489.3	3385.4	6626.8
B6cont5 L0R0 8w		265.4	592	138.3	1299	250.5	526.3	194	1094	588.8	2413	3480.7	3406.1	2665.5	668.9	511.5	1095.3	1397.9	104.7	1789	564	803.8	581.7	1142.3	695.4	265.4	592	138.3	1299	250.5	526.3	194	1094					B6AB7 L1R0 P56		472.3	863.9	188.4	169.4	756.8	192.1	402.6	1119.6	2681.4	4772.5
B6cont1 L0R2 8w		1768.2	970.1	114.7	362.2	164.4	488.6	484.3	845.7	1855.9	5073.8	5147.8	5948.8	4062.4	1644.9	791.7	3405.4	110.3	2338.2	4048.7	2246.1	100.5	2490.4	102.7	462.6	1768.2	970.1	114.7	362.2	164.4	488.6	484.3	845.7					B6AB7 L1R1 P56		1032	478.6	220.5	602.5	296.9	236.8	2170.6	244.6	1845.9	5977.5
B6cont1 L2R0 8w		589.4	1796	590.5	559.2	309.8	317	1294.4	340.3	1634.7	4146.3	3946.5	3178.2	644	2887.6	520	935.1	1352.4	2049.8	4462.6	3514.7	1007.9	307.9	1236.5	328.8	589.4	1796	590.5	559.2	309.8	317	1294.4	340.3					B6AB7 L0R2 P56		395.3	478.7	515.2	479.5	174.7	809.7	158.1	1222.9	908.6	5331.9
B6cont3 L0R0 8w		940.3	356.2	494.5	158.4	455.5	604.4	296.5	623.5	2563.7	2666.3	1374.5	431.5	2214.5	2262.4	802.9	270.2	1490.3	237.5	1789.1	1482.1	231.4	2797	495.6	266.1	940.3	356.2	494.5	158.4	455.5	604.4	296.5	623.5					B6AB6 L0R0 P58		393.5	1020.7	122.9	497.8	123.5	392.9	109.5	1182.7	1052.6	3113.4
B6cont3 L0R1 8w		1114.9	164.2	1513.6	114.4	336.9	211.8	981.6	176.3	486.9	3715.6	2161.8	3129	143.1	1983.3	1639.8	124.1	154.1	2038.8	2776.1	141.3	677.1	1468.8	172.2	332.8	1114.9	164.2	1513.6	114.4	336.9	211.8	981.6	176.3					B6AB6 L0R1 P58		112.6	103.6	928.8	105.3	315.1	92.5	1111.2	382.5	1083	4766.5
B6cont5 L0R1 8w		1017.3	91.5	362.5	361.9	117.7	128.4	794.5	180.3	1154.4	3465.9	1717.5	2867.1	2325.7	631.3	739.1	1925.6	228.6	709.3	2404	1274.5	660.2	136.5	622.4	114.9	1017.3	91.5	362.5	361.9	117.7	128.4	794.5	180.3					B6AB6 L1R0 P58		160.5	162.9	605.5	107.9	693.4	144	147.7	865.2	3433.1	6560.9
B6cont5 L1R0 8w		660.7	696.2	121.6	288.3	227.7	659	452.6	673.9	1942.1	5194.6	5580.1	2102.2	1303.6	811.9	1756.1	1390.2	529.7	845.1	2665.4	893.4	609.5	111	950.4	153.3	660.7	696.2	121.6	288.3	227.7	659	452.6	673.9					B6AB6 L1R1 P58		352.5	84.5	80.6	697.1	169.5	131.5	681.8	477.3	4749.6	7099.3
B6Cont6 L0R0 P56		140.4	96.9	449.1	92.5	345.7	109.5	892	191.4	2719.5	8109.8	7530.6	3982.9	2737.5	97.5	1684.7	116.3	1383.9	618.4	3892.7	464.8	531.3	139.8	1172.7	142.9	140.4	96.9	449.1	92.5	345.7	109.5	892	191.4					B6AB13 L0R0 P59		841.4	1225.1	605.4	281.1	119.7	270.7	139.5	1781.2	6280.8	5769.9
B6Cont6 L0R1 P56		1363.6	424.5	665.8	370.4	310.8	417.7	1002.7	573.2	2985.9	5717.8	4051.2	2647.1	392.5	1137	339.7	1437.3	267.9	1376.7	1757.4	801.7	233.1	2067	236.3	457.3	1363.6	424.5	665.8	370.4	310.8	417.7	1002.7	573.2					B6AB13 L0R1 P59		121.9	468.3	271.3	98.2	672.9	202.5	714.9	365.1	179.3	702.5
B6Cont6 L1R0 P56		546.3	642.4	501.1	301.4	228	829.2	506.9	546.5	1441.1	3165.3	2584	1582.4	2625.1	1773.9	746.8	595	663.7	1195.6	2119.8	2165.1	212.5	685.3	933.1	590.5	546.3	642.4	501.1	301.4	228	829.2	506.9	546.5					B6AB13 L1R0 P59		2030.8	117.8	796.9	997.8	110.3	1616.1	155.4	1475.1	718.7	261.1
B6cont8 L0R0 P58		1107.8	344	372.4	367	109.9	554	309.2	858.8	3099.8	4905.6	3582.7	2686.5	2055	1095.8	801.7	928	173	2217.1	2548.4	795.5	1436.2	1268.6	132.3	597.6	1107.8	344	372.4	367	109.9	554	309.2	858.8						Average	600.956	330.839	542.55	352.161	377.639	427.817	504.678	666.2	2248.97	4719.82
B6cont8 L0R1 P58		938.9	294.6	750.4	318.2	353.2	1152.4	457.1	402.4	1056.6	4019.4	7607.1	4131.7	2880.4	1858.6	394.1	1248.2	473.2	1125.8	3066	2325.3	614.4	324.4	890.7	846.6	938.9	294.6	750.4	318.2	353.2	1152.4	457.1	402.4						SE	112.834	84.6148	75.0787	78.0646	62.7481	96.7228	138.151	116.449	384.818	509.752
B6cont8 L1R0 P58		1026.7	126.8	169.1	199.3	931.1	150.6	529.9	568.7	1272.7	2673	2563.8	2587.9	2260.7	344.7	1530.6	813.7	1272	1409.2	2450.9	1298.6	1206.6	285.4	1552.5	439	1026.7	126.8	169.1	199.3	931.1	150.6	529.9	568.7						SD	478.714	358.99	318.532	331.2	266.218	410.36	586.126	494.049	1632.64	2162.7
B6cont8 L1R1 P58		1544.1	130	1013.1	108.5	492.2	493.9	301.9	798.4	784.5	4107.3	4469.8	1239.6	996.2	1048.6	427.4	2275	1637.4	1853.5	1768.8	490.3	368.9	974.6	353.4	235.9	1544.1	130	1013.1	108.5	492.2	493.9	301.9	798.4																0.1238
B6cont10 L0R0 P60		141.1	92.3	331.8	103.1	279	726.3	160.2	721.1	4508.3	6068.1	3381.6	2682.5	108.2	1764.6	285	339.4	1196.8	1505.6	2137.5	257.7	113.4	1933	197.2	382.5	141.1	92.3	331.8	103.1	279	726.3	160.2	721.1																Unpaired t test
B6cont10 L0R1 P60		1837.3	682.2	193.3	862.9	169.5	651.9	162.2	783.9	2265.1	6249.2	5088	2820.1	350.9	994	1303	253.5	753	1858	2926.5	718.9	895.1	139.3	1189.7	188	1837.3	682.2	193.3	862.9	169.5	651.9	162.2	783.9
B6cont10 L1R0 P60		408.5	804.6	246	355.8	149.7	974.7	124.5	745.6	5507.9	7452.4	4737.2	3968.5	954.6	662.2	2647.3	592.3	701.2	2786.1	2353.3	1318.1	935.9	326.2	817	216.9	408.5	804.6	246	355.8	149.7	974.7	124.5	745.6
B6cont10 L1R1 P60		94.5	127	1161.9	101.8	458.6	584.2	250.8	102.7	1827.4	3672.3	3246.6	1870.6	378.4	2232.6	999.3	383.3	1756.3	1472.2	2489.2	112.7	141.4	1373.3	116.2	975.3	94.5	127	1161.9	101.8	458.6	584.2	250.8	102.7
B6Cont11 L0R0 P59		731.2	424.5	658	119.9	478.3	486.3	141.8	263.4	1218.7	846.3	1259	3112.4	2275.4	1734.2	743.7	651.4	140.6	1108.9	1488.4	873.2	114.3	2074.9	353.3	421.3	731.2	424.5	658	119.9	478.3	486.3	141.8	263.4
B6Cont11 L0R1 P59		181.8	680.6	799.6	215.5	205.6	1184.1	202	1187	389.4	1392.2	1339	3758.3	6966.8	3222.4	288.9	455.3	1633.6	457.4	2949	5086.6	786.8	453	798.3	1129	181.8	680.6	799.6	215.5	205.6	1184.1	202	1187
	Average	752.9	493.3	488.061	353.239	372.625	469.843	480.743	520.075	1715.38	3787.29	3519.83	2644.96	1801.57	1600.18	990.893	1004.58	805.789	1386.2	2590.79	1286.99	661.557	877.368	705.607	453.232	752.9	493.3	488.061	353.239	372.625	469.843	480.743	520.075
	SE	95.2548	82.1147	63.6705	56.3334	46.294	57.691	60.5504	55.7845	228.44	346.43	311.356	222.102	276.936	199.689	122.973	146.448	107.535	134.786	160.974	229.282	124.258	149.381	95.4048	57.8216	95.2548	82.1147	63.6705	56.3334	46.294	57.691	60.5504	55.7845
	SD	504.041	434.51	336.913	298.088	244.965	305.272	320.403	295.184	1208.79	1833.13	1647.54	1175.26	1465.41	1056.65	650.714	774.929	569.023	713.218	851.792	1213.25	657.513	790.452	504.835	305.963	504.041	434.51	336.913	298.088	244.965	305.272	320.403	295.184
	Day of time	12	13	14	15	16	17	18	19	20	21	22	23	0	1	2	3	4	5	6	7	8	9	10	11
	Control	752.9	493.3	488.061	353.239	372.625	469.843	480.743	520.075	1715.38	3787.29	3519.83	2644.96	1801.57	1600.18	990.893	1004.58	805.789	1386.2	2590.79	1286.99	661.557	877.368	705.607	453.232	752.9	493.3	488.061	353.239	372.625	469.843	480.743	520.075
	AB	600.956	330.839	542.55	352.161	377.639	427.817	504.678	666.2	2248.97	4719.82	3614.29	2687.05	2662.66	1058.05	1044.12	1516.58	1129.89	1919.51	2628.89	1122.01	1075.17	580.172	662.433	641.383	600.956	330.839	542.55	352.161	377.639	427.817	504.678	666.2
	Control SE	95.2548	82.1147	63.6705	56.3334	46.294	57.691	60.5504	55.7845	228.44	346.43	311.356	222.102	276.936	199.689	122.973	146.448	107.535	134.786	160.974	229.282	124.258	149.381	95.4048	57.8216	95.2548	82.1147	63.6705	56.3334	46.294	57.691	60.5504	55.7845
	AB SE	112.834	84.6148	75.0787	78.0646	62.7481	96.7228	138.151	116.449	384.818	509.752	324.609	384.764	540.478	176.395	301.369	385.573	309.551	349.691	261.715	220.703	179.198	110.388	123.083	117.563	112.834	84.6148	75.0787	78.0646	62.7481	96.7228	138.151	116.449
[truncated: 22 more columns]

## Sheet: Raw data Fig. 5c-e
	Locomotion 0-30(A+B+C)	Locomotion 30-60 (A+B+C)	Locomotion 60-90 (A+B+C)	Locomotion 90-120 (A+B+C)	Locomotion 0-30(A+B)	Locomotion 30-60 (A+B)	Locomotion 60-90 (A+B)	Locomotion 90-120 (A+B)	Locomotion 0-30(A)	Locomotion 30-60 (A)	Locomotion 60-90 (A)	Locomotion 90-120 (A)			Locomotion 0-30(A+B+C)	Locomotion 30-60 (A+B+C)	Locomotion 60-90 (A+B+C)	Locomotion 90-120 (A+B+C)	Locomotion 0-30(A+B)	Locomotion 30-60 (A+B)	Locomotion 60-90 (A+B)	Locomotion 90-120 (A+B)	Locomotion 0-30(A)	Locomotion 30-60 (A)	Locomotion 60-90 (A)	Locomotion 90-120 (A)
B6cont1♂L0R2	13397	10899	9063	7496	2819	2442	1807	1392	184	92	102	63		B6AB2♂L1R1	17790	7083	3400	1664	1097	554	14	69	12	15	0	7
B6cont4♂L0R0	13951	10104	8780	8127	3232	3095	2965	3503	169	240	362	235		B6AB2♂L0R2	18873	11162	7223	4958	1094	1194	788	486	11	17	16	1
B6cont4♂L0R1	12521	7242	3798	3738	1829	774	566	427	76	11	15	0		B6AB2♂L2R0	11695	5513	1515	1931	2097	1496	388	553	109	73	5	14
B6cont4♂L1R0	10138	7675	4665	3169	1897	1331	980	470	69	58	92	24		B6AB1♂L0R0	14375	8680	3716	2852	1014	729	358	266	36	24	5	7
B6cont3♂L0R0	10719	2718	2860	0	640	496	259	0	18	30	15	0		B6AB2♂L0R1	12861	7171	3912	10	1145	1051	386	0	15	6	0	0
B6cont3♂L0R1	12312	8662	7247	1185	1491	1712	1705	192	13	37	88	0		B6AB2♂L1R0	12335	8875	2271	5449	1553	900	112	923	59	7	0	24
B6cont5♂L0R1	14387	5877	4669	6	2203	917	877	0	96	10	46	0		B6AB7♂L0R0	14059	9665	9450	5272	3275	2373	2620	1337	359	101	184	89
B6cont5♂L1R0	19158	12721	3544	23	2432	2489	586	0	126	91	52	0		B6AB7♂L0R1	10044	6357	3770	2411	940	623	296	229	29	14	0	0
B6cont1♂L0R0	12999	11687	10969	9950	3000	3321	3081	2701	242	185	258	143		B6AB7♂L1R0	13766	10774	8173	8214	1187	1312	1020	499	18	25	18	0
B6cont1♂L0R1	9957	6239	3589	1138	763	306	151	49	17	8	8	0		B6AB7♂L1R1	13328	7636	5828	2148	2305	1649	1586	339	77	65	29	18
B6cont1♂L1R0	13474	6546	5096	1882	1328	700	805	256	8	13	28	0		B6AB7♂L0R2	11351	5996	1632	3111	1716	1308	270	764	33	0	0	2
B6cont1♂L1R1	14672	9775	3557	5342	1659	1202	341	516	38	41	2	16		B6AB6♂L0R0	12860	4555	5359	3069	2794	780	1466	728	178	28	99	64
B6cont6♂L0R0	14772	7675	2895	1616	3646	2073	501	234	283	107	37	8		B6AB6♂L0R1	11358	3313	3509	1305	1028	154	122	143	8	1	1	9
B6cont6♂L0R1	10846	4476	88	1956	1033	359	0	123	16	0	0	1		B6AB6♂L1R0	11156	5237	2287	3589	575	459	84	184	18	0	0	0
B6cont6♂L1R0	13259	8558	6201	3822	1530	1421	623	439	12	15	5	5		B6AB6♂L1R1	13972	6839	1185	3426	2117	843	127	504	29	35	0	16
B6cont8♂L0R0	13400	8933	7794	5366	3527	2218	1680	549	224	209	99	17		B6AB13♂L0R0	14702	9520	5945	1668	1165	860	759	177	22	2	34	0
B6cont8♂L0R1	13712	7176	828	4902	1750	1022	27	870	48	28	0	21		B6AB13♂L0R1	11369	7871	4524	4711	1203	1069	634	637	23	14	19	24
B6cont8♂L1R0	16496	9575	5642	2441	1681	1090	642	277	15	8	7	4		B6AB13♂L1R0	14507	8323	1593	4822	2179	1130	298	760	105	12	5	1
B6cont8♂L1R1	13497	9182	4993	8197	2022	1433	655	1589	75	54	31	43
B6cont11♂L0R0	14992	9130	9577	8935	1945	1170	1857	2276	48	20	115	93
B6cont11♂L0R1	12316	11080	4692	12	2369	2783	1000	0	118	238	129	0		Average	13355.6	7476.11	4182.89	3367.22	1582.44	1026.89	629.333	477.667	63.3889	24.3889	23.0556	15.3333
Average	13379.8	8377.62	5264.14	3776.33	2037.9	1540.67	1005.14	755.381	90.2381	71.1905	71	32.0476		SE	534.365	500.209	566.825	457.88	171.291	118.804	159.319	80.9079	20.3592	6.61704	11.0114	5.68739
SE	462.07	526.976	615.527	702.737	183.444	195.8	190.481	214.911	18.4485	17.3254	19.9136	12.9321		SD	2267.12	2122.21	2404.83	1942.62	726.726	504.041	675.934	343.263	86.3768	28.0737	46.7175	24.1296
SD	2117.47	2414.91	2820.7	3220.34	840.648	897.268	872.894	984.847	84.5416	79.395	91.2557	59.2625			0.9728	0.2271	0.2099	0.6289	0.0783	0.0319	0.1463	0.8325	0.334	0.0358	0.0095	0.9313
															Unpaired t test	Unpaired t test	Unpaired t test	Welch's	Mann-Whitney U test	Unpaired t test	Unpaired t test	Mann-Whitney U test	Unpaired t test	Mann-Whitney U test	Mann-Whitney U test	Mann-Whitney U test
Locomotor activity in area (A+B+C)	0-30	30-60	60-90	90-120			Locomotor activity in area (A+B)							Locomotor activity in area A
Control	13379.8	8377.62	5264.14	3776.33				0-30	30-60	60-90	90-120				0-30	30-60	60-90	90-120
AB	13355.6	7476.11	4182.89	3367.22			Control	2037.9	1540.67	1005.14	755.381			Control	90.2381	71.1905	71	32.0476
							AB	1582.44	1026.89	629.333	477.667			AB	63.3889	24.3889	23.0556	15.3333
Control SE	462.07	526.976	615.527	702.737
AB SE	534.365	500.209	566.825	457.88			Control SE	183.444	195.8	190.481	214.911			Control SE	18.4485	17.3254	19.9136	12.9321
							AB SE	171.291	118.804	159.319	80.9079			AB SE	20.3592	6.61704	11.0114	5.68739

## Sheet: Raw data Fig. S5a
	Locomotion 120 (A+B+C)			Locomotion 120 (A+B+C)
B6cont1♂L0R2	40855		B6AB2♂L1R1	29937
B6cont4♂L0R0	40962		B6AB2♂L0R2	42216
B6cont4♂L0R1	27299		B6AB2♂L2R0	20654
B6cont4♂L1R0	25647		B6AB1♂L0R0	29623
B6cont3♂L0R0	16297		B6AB2♂L0R1	23954
B6cont3♂L0R1	29406		B6AB2♂L1R0	28930
B6cont5♂L0R1	24939		B6AB7♂L0R0	38446
B6cont5♂L1R0	35446		B6AB7♂L0R1	22582
B6cont1♂L0R0	45605		B6AB7♂L1R0	40927
B6cont1♂L0R1	20923		B6AB7♂L1R1	28940
B6cont1♂L1R0	26998		B6AB7♂L0R2	22090
B6cont1♂L1R1	33346		B6AB6♂L0R0	25843
B6cont6♂L0R0	26958		B6AB6♂L0R1	19485
B6cont6♂L0R1	17366		B6AB6♂L1R0	22269
B6cont6♂L1R0	31840		B6AB6♂L1R1	25422
B6cont8♂L0R0	35493		B6AB13♂L0R0	31835
B6cont8♂L0R1	26618		B6AB13♂L0R1	28475
B6cont8♂L1R0	34154		B6AB13♂L1R0	29245
B6cont8♂L1R1	35869
B6cont11♂L0R0	42634
B6cont11♂L0R1	28100		Average	28381.8
Average	30797.9		SE	1567.21
SE	1738.35		SD	6649.1
SD	7966.12			0.3154
				Unpaired t test								Student's t test	Student's t test	Student's t test	Mann-Whitney U test	Mann-Whitney U test	Student's t test			Mann-whitney U test
	Locomotion 120 (A+B+C)
	Control	AB
Average	30797.9	28381.8
SE	1738.35	1567.21

## Sheet: Raw data Fig. S5b
	Rearing 120 (A+B+C)				Rearing 120 (A+B+C)
B6cont1♂L0R2	1154			B6AB2♂L1R1	480
B6cont4♂L0R0	865			B6AB2♂L0R2	921
B6cont4♂L0R1	422			B6AB2♂L2R0	457
B6cont4♂L1R0	532			B6AB1♂L0R0	608
B6cont3♂L0R0	274			B6AB2♂L0R1	351
B6cont3♂L0R1	734			B6AB2♂L1R0	494
B6cont5♂L0R1	418			B6AB7♂L0R0	951
B6cont5♂L1R0	507			B6AB7♂L0R1	458
B6cont1♂L0R0	1091			B6AB7♂L1R0	1505
B6cont1♂L0R1	370			B6AB7♂L1R1	778
B6cont1♂L1R0	549			B6AB7♂L0R2	436
B6cont1♂L1R1	663			B6AB6♂L0R0	670
B6cont6♂L0R0	385			B6AB6♂L0R1	336
B6cont6♂L0R1	271			B6AB6♂L1R0	483
B6cont6♂L1R0	824			B6AB6♂L1R1	484
B6cont8♂L0R0	1157			B6AB13♂L0R0	660
B6cont8♂L0R1	406			B6AB13♂L0R1	529
B6cont8♂L1R0	725			B6AB13♂L1R0	399
B6cont8♂L1R1	543
B6cont11♂L0R0	558
B6cont11♂L0R1	635			Average	611.111
Average	623			SE	67.1726
SE	58.6208			SD	284.989
SD	268.634				0.746
					Mann-Whitney
	Control	AB
Average	623	611.111
SE	58.6208	67.1726
