# Supplementary material for: Administration of Non-Absorbable Antibiotics to Pregnant Mice to Perturb the Maternal Gut Microbiota Is Associated with Alterations in Offspring Behavior
Source: PLoS One. 2016 Jan 20;11(1):e0138293. doi: 10.1371/journal.pone.0138293 (PMC4720425; doi:10.1371/journal.pone.0138293)
Supplement: S6 Data — (XLSX) [file pone.0138293.s006.xlsx]

## Sheet: Raw data  to S1 Figure
Volume consumption (ml/day)	Day1-2	Day3-4	Day5-6	Day7		Volume consumption (ml/day)	Day1-2	Day3-4	Day5-6	Day7
B6 Control6	8.05	6.05	6.5	6		B6 AB6	4.9	8	7.5	6
B6 Control8	12.05	6.55	5.85	5.7		B6 AB7	7	8.45	8.75	8.4
B6 Control10	6	6.3	6.1	5.1		B6 AB10	2.9	6	6	7.2
B6 Control6	6.05	6.1	12.35	6		B6 AB13	3.75	3.6	8.05	6.2
B6 Control A	5.75	4.8	6.75	9		B6 AB E	3.05	3.05	8.75	13.1
B6 Control B	6.8	5.8	7.1	9.2		B6 AB1	3.75	4.6	7.25	6.6
B6 Control C	5.55	5.05	5.85	8.2		B6 AB2	3.75	7.55	6	9.7
B6 Control D	6.6	6.25	6.75	9		B6 AB3	2.5	3.5	6.5	10.7
B6 Control E	5.55	5.7	6.6	8.1		B6 AB4	2.55	2.55	8.8	12
B6 Control1	7.75	5.9	7.75	9.6		B6 AB5	3.25	3.15	7.25	8
B6 Control3	6.1	5.6	6.65	8.2		B6 AB M	4.75	5.85	7.55	11.5
B6 Control4	6	5.05	6.1	7		B6 AB N	5.55	4.1	6.65	9.1
B6 Control5	5.6	4.4	2.6	6.1		B6 AB O	3.5	4.5	6.5	11.8
B6 Control L	7.5	6.1	5.75	10.8		B6 AB P	4.55	6.6	6.1	10.1
B6 Control N	7.45	5.75	5.5	5.4		Average	3.98214	5.10714	7.26071	9.31429
Average	6.85333	5.69333	6.54667	7.56		SE	0.335926	0.525107	0.273619	0.621577
SE	0.430599	0.157878	0.508065	0.458237		SD	1.25692	1.96477	1.02379	2.32573
SD	1.6677	0.611458	1.96773	1.77474			< 0.0001	0.3019	0.0602	0.0298
							Student's t test	Welch's	Mann-Whitney U test	Student's t test
	Day1-2	Day3-4	Day5-6	Day7
Control	6.85333	5.69333	6.54667	7.56
AB	3.98214	5.10714	7.26071	9.31429
Control SE	0.430599	0.157878	0.508065	0.458237
AB SE	0.335926	0.525107	0.273619	0.621577
