# Supplementary material for: Administration of Non-Absorbable Antibiotics to Pregnant Mice to Perturb the Maternal Gut Microbiota Is Associated with Alterations in Offspring Behavior
Source: PLoS One. 2016 Jan 20;11(1):e0138293. doi: 10.1371/journal.pone.0138293 (PMC4720425; doi:10.1371/journal.pone.0138293)
Supplement: S7 Data — (XLSX) [file pone.0138293.s007.xlsx]

## Sheet: Rawdata Fig. S3b
	Empty	Stranger	Familier-1	Familier-2	Familier-3	Stranger			Empty	Stranger	Familier-1	Familier-2	Familier-3	Stranger
B6cont4 L0R0 4w	56.5	129.5	60	32	126	129		B6AB2 L1R1	81	253.5	237.5	27.5	151.5	165.5
B6cont4 L0R1 4w	72	191	143.5	56.5	78	49		B6AB2 L0R2	31	158	151.5	10.5	98	0
B6cont1 L1R0 4w	58.5	167.5	89	71.5	47.5	112		B6AB2 L2R0 4w	50.5	31.5	130.5	34	89	154.5
B6cont4 L1R1 4w	54.5	216	147.5	76	221	137.5		B6AB1 L0R0 4w	52	208.5	159.5	150	49	103
B6cont5 L0R0 4w	39.5	172.5	182	124	102.5	153		B6AB2 L0R1 4w	97.5	164	125.5	60.5	121.5	74
B6cont5 L0R1 4w	36	187.5	156.5	132	153	96.5		B6AB2 L1R0 4w	146	162	54	122.5	158	72
B6cont1 L0R2 4w	55	69.5	235	164.5	215	57.5		B6 AB7 L0R2 4w	74	156.5	61	64.5	7.5	110
B6 Cont5 L1R0 4w	42	135	103	149.5	89.5	151.5		B6 AB7 L0R0 4w	98.5	121.5	168	98	165	66.5
B6 Cont1 L2R0 4w	62	190	73.5	129.5	55.5	136.5		B6AB7 L0R1 4w	35.5	221	143	126	42.5	172.5
B6cont3 L0R0	83.5	219	237	170.5	136.5	210.5		B6AB7 L1R0 4w	62	94.5	87.5	66	154	14.5
B6 Cont3 L0R1	34	186.5	76.5	0	53	81.5		B6AB7 L1R1 4w	56.5	181.5	110	157.5	45.5	176.5
B6cont4 L0R2 4w	132.5	209	127.5	169	78	264.5		B6AB6 L0R0 4w	87.5	164.5	154.5	123	126	188
B6 Cont1 L0R0 4w	64	138.5	101.5	64	89	40.5		B6AB6 L0R1 4w	76	202	181	106	201.5	174.5
B6 Cont1 L0R1 4w	106.5	198	120	75	170	72.5		B6 AB6 L1R0 4w	103	131.5	150.5	167.5	110	161
B6 Cont1 L1R0 4w	66.5	140.5	66.5	179.5	170	162		B6AB6 L1R1 4w	70.5	199.5	237.5	184.5	200.5	193
B6 Cont1 L1R1 4w	103.5	175	100.5	74	27	200		Average	74.7667	163.333	143.433	99.8667	114.633	121.7
B6 Cont6 L0R0 4w	53.5	108	80.5	97	74	86		SE	7.63262	14.0727	13.7558	13.9476	15.2978	16.471
B6 Cont6 L0R1 4w	52	156.5	121	78.5	137	168.5		SD	29.561	54.5035	53.2759	54.019	59.2481	63.7917
B6Cont6 L1R0 4w	78	133.5	79.5	108	80.5	166.5			0.8275	0.8281	0.2565	0.9598	0.5007	0.8852
B6 Cont10 L0R0 4w	93.5	224	162	119	193	281			Unpaired t test	Unpaired t test	Unpaired t test	Unpaired t test	Unpaired t test	Mann-Whitney U test
B6Cont10 L0R1 4w	125	156.5	210	206	200	191.5
B6cont10 L1R0 4w	75.5	224	124	226.5	17.5	148
B6cont10 L1R1 4w	68.5	124	111.5	0	92.5	258.5
B6cont8 L0R0 4w	79	147.5	68	62.5	49	65
B6Cont8 L0R1 4w	135	175.5	168.5	49.5	0	0
B6Cont8 L1R0 4w	62.5	101.5	100.5	83	37	118
B6 Cont8 L1R1 4w	75.5	222	118	24.5	37	151.5
Average	72.7593	166.593	124.556	100.815	101.074	136.611
SE	5.3459	7.93627	9.54657	11.5529	12.1955	13.463
SD	27.7781	41.2381	49.6054	60.0308	63.3694	69.9557
Spent time around the right cage areas (s)	Empty	Stranger	Familiar-1	Familiar-2	Familiar-3	2nd stranger
Control	72.7593	166.593	124.556	100.815	101.074	136.611
AB	74.7667	163.333	143.433	99.8667	114.633	121.7
Control SE	5.3459	7.93627	9.54657	11.5529	12.1955	13.463
AB SE	7.63262	14.0727	13.7558	13.9476	15.2978	16.471
