# Supplementary material for: Administration of Non-Absorbable Antibiotics to Pregnant Mice to Perturb the Maternal Gut Microbiota Is Associated with Alterations in Offspring Behavior
Source: PLoS One. 2016 Jan 20;11(1):e0138293. doi: 10.1371/journal.pone.0138293 (PMC4720425; doi:10.1371/journal.pone.0138293)
Supplement: S8 Data — (XLSX) [file pone.0138293.s008.xlsx]

## Sheet: Behavioral test 4W, 7-8W
HCA=24hr home cage activity test		4W	HCA 4W-control	OF 4W-control	SI 4W-control		HCA 4W-AB	OF 4W-AB	SI 4W-AB		4W & 7-8W comparison	HCA 4W-control	HCA 8W-control	OF 4W-control	OF 8W-control		HCA 4W-AB	HCA 8W-AB	OF 4W-AB	OF 8W-AB
OF=Open field test			B6cont1 L0R0	B6cont1♂L0R0	B6 Cont1 L0R0 4w		B6AB1 L0R0	B6AB1♂L0R0	B6AB1 L0R0 4w			B6cont1 L0R0	B6cont1 L0R0 8w	B6cont1♂L0R0	B6cont1♂L0R0		B6AB1 L0R0	B6AB1 L0R0 8w	B6AB1♂L0R0	B6AB1♂L0R0
SI=social interaction test			B6cont1 L0R1	B6cont1♂L0R1	B6 Cont1 L0R1 4w		B6AB2 L0R1	B6AB2♂L0R1	B6AB2 L0R1 4w			B6cont1 L0R1	B6cont1 L0R1 8w	B6cont1♂L0R1	B6cont1♂L0R1		B6AB2 L0R1	B6AB2 L0R1 8w	B6AB2♂L0R1	B6AB2♂L0R1
			B6cont1 L1R0	B6cont1♂L1R0	B6 Cont1 L1R0 4w		B6AB2 L1R0	B6AB2♂L1R0	B6AB2 L1R0 4w			B6cont1 L1R0	B6cont1 L1R0 8w	B6cont1♂L1R0	B6cont1♂L1R0		B6AB2 L1R0	B6AB2 L1R0 8w	B6AB2♂L1R0	B6AB2♂L1R0
			B6cont1 L1R1	B6cont1♂L1R1	B6 Cont1 L1R1 4w		B6 AB2 L1R1 4w	B6AB2♂L1R1	B6AB2 L1R1			B6cont1 L1R1	B6cont1 L1R1 8w	B6cont1♂L1R1	B6cont1♂L1R1		B6 AB2 L1R1 4w	B6AB2 L1R1 8w	B6AB2♂L1R1	B6AB2♂L1R1
			B6cont1 L0R2 4w	B6cont1♂L0R2	B6cont1 L0R2 4w		B6 AB2 L0R2 4w	B6AB2♂L0R2	B6AB2 L0R2			B6cont1 L0R2 4w	B6cont1 L0R2 8w	B6cont1♂L0R2	B6cont1♂L0R2		B6 AB2 L0R2 4w	B6AB2 L0R2 8w	B6AB2♂L0R2	B6AB2♂L0R2
			B6cont1 L2R0 4w	B6cont1♂L2R0	B6 Cont1 L2R0 4w		B6 AB2 L2R0 4w	B6AB2♂L2R0	B6AB2 L2R0 4w			B6cont1 L2R0 4w	B6cont1 L2R0 8w	B6cont1♂L2R0			B6 AB2 L2R0 4w	B6AB2 L2R0 8w	B6AB2♂L2R0	B6AB2♂L2R0
			B6cont3 L0R0 4w	B6cont3♂L0R0	B6cont3 L0R0		B6AB6L0R0 4w	B6AB6♂L0R0	B6AB6 L0R0 4w			B6cont3 L0R0 4w	B6cont3 L0R0 8w	B6cont3♂L0R0	B6cont3♂L0R0		B6AB6L0R0 4w	B6AB6L0R0 4w	B6AB6♂L0R0	B6AB6♂L0R0
			B6cont3 L0R1 4w	B6cont3♂L0R1	B6 Cont3 L0R1		B6AB6L0R1 4w	B6AB6♂L0R1	B6AB6 L0R1 4w			B6cont3 L0R1 4w	B6cont3 L0R1 8w	B6cont3♂L0R1	B6cont3♂L0R1		B6AB6L0R1 4w	B6AB6L0R1 4w	B6AB6♂L0R1	B6AB6♂L0R1
			B6 cont4 L0R0 4w	B6cont4♂L0R0	B6cont4 L0R0 4w		B6AB6L1R0 4w	B6AB6♂L1R0	B6 AB6 L1R0 4w			B6 cont4 L0R0 4w	B6cont4 L0R0 8w	B6cont4♂L0R0	B6cont4♂L0R0		B6AB6L1R0 4w	B6AB6L1R0 4w	B6AB6♂L1R0	B6AB6♂L1R0
			B6 cont4 L0R1 4w	B6cont4♂L0R1	B6cont4 L0R1 4w		B6AB6L1R1 4w	B6AB6♂L1R1	B6AB6 L1R1 4w			B6 cont4 L0R1 4w	B6cont4 L0R1 8w	B6cont4♂L0R1	B6cont4♂L0R1		B6AB6L1R1 4w	B6AB6L1R1 4w	B6AB6♂L1R1	B6AB6♂L1R1
			B6 cont4 L1R0 4w	B6cont4♂L1R0	B6cont4 L1R0 4w		B6AB7 L0R0 4w	B6 AB7 ♂L0R0	B6 AB7 L0R2 4w			B6 cont4 L1R0 4w	B6cont4 L1R0 8w	B6cont4♂L1R0	B6cont4♂L1R0		B6AB7 L0R0 4w	B6AB7 L0R0 4w	B6 AB7 ♂L0R0	B6AB7♂L0R0
			B6 cont4 L1R1 4w		B6cont4 L1R1 4w		B6AB7 L0R1 4w	B6AB7♂L0R1	B6 AB7 L0R0 4w			B6 cont4 L1R1 4w					B6AB7 L0R1 4w	B6AB7 L0R1 4w	B6AB7♂L0R1	B6AB7♂L0R1
			B6cont4 L0R2		B6cont4 L0R2 4w		B6AB7 L1R0 4w	B6AB7♂L1R0	B6AB7 L0R1 4w			B6cont4 L0R2	B6cont4 L0R2 8w				B6AB7 L1R0 4w	B6AB7 L1R0 4w	B6AB7♂L1R0	B6AB7♂L1R0
			B6 cont5 L0R0 4w		B6cont5 L0R0 4w		B6AB7 L1R1 4w	B6AB7♂L1R1	B6AB7 L1R0 4w			B6 cont5 L0R0 4w	B6cont5 L0R0 8w				B6AB7 L1R1 4w	B6AB7 L1R1 4w	B6AB7♂L1R1	B6AB7♂L1R1
			B6cont5 L0R1 4w	B6cont5♂L0R1	B6cont5 L0R1 4w		B6AB7 L0R2 4w	B6AB7♂L0R2	B6AB7 L1R1 4w			B6cont5 L0R1 4w	B6cont5 L0R1 8w	B6cont5♂L0R1	B6cont5♂L0R1		B6AB7 L0R2 4w	B6AB7 L0R2 4w	B6AB7♂L0R2	B6AB7♂L0R2
			B6cont5 L1R0 4w	B6cont5♂L1R0	B6 Cont5 L1R0 4w		B6 AB13 L0R0 P31	B6AB13♂L0R0				B6cont5 L1R0 4w	B6cont5 L1R0 8w	B6cont5♂L1R0	B6cont5♂L1R0		B6 AB13 L0R0 P31	B6AB13 L0R0 P59	B6AB13♂L0R0	B6AB13♂L0R0
			B6Cont6 L0R0 4w	B6cont6♂L0R0	B6 Cont6 L0R0 4w		B6 AB13 L0R1 P31	B6AB13♂L0R1				B6Cont6 L0R0 4w	B6Cont6 L0R0 P56	B6cont6♂L0R0	B6cont6♂L0R0		B6 AB13 L0R1 P31	B6AB13 L0R1 P59	B6AB13♂L0R1	B6AB13♂L0R1
			B6Cont6 L0R1 4w	B6cont6♂L0R1	B6 Cont6 L0R1 4w		B6 AB13 L1R0 P31	B6AB13♂L1R0				B6Cont6 L0R1 4w	B6Cont6 L0R1 P56	B6cont6♂L0R1	B6cont6♂L0R1		B6 AB13 L1R0 P31	B6AB13 L1R0 P59	B6AB13♂L1R0	B6AB13♂L1R0
			B6Cont6 L1R0 4w	B6cont6♂L1R0	B6Cont6 L1R0 4w							B6Cont6 L1R0 4w	B6Cont6 L1R0 P56	B6cont6♂L1R0	B6cont6♂L1R0
			B6Cont8L0R0 4w	B6cont8♂L0R0	B6cont8 L0R0 4w							B6Cont8L0R0 4w	B6cont8 L0R0 P58	B6cont8♂L0R0	B6cont8♂L0R0
			B6Cont8L0R1 4w	B6cont8♂L0R1	B6Cont8 L0R1 4w							B6Cont8L0R1 4w	B6cont8 L0R1 P58	B6cont8♂L0R1	B6cont8♂L0R1
			B6Cont8L1R0 4w	B6cont8♂L1R0	B6Cont8 L1R0 4w							B6Cont8L1R0 4w	B6cont8 L1R0 P58	B6cont8♂L1R0	B6cont8♂L1R0
			B6Cont8L1R1 4w	B6cont8♂L1R1	B6 Cont8 L1R1 4w							B6Cont8L1R1 4w	B6cont8 L1R1 P58	B6cont8♂L1R1	B6cont8♂L1R1
			B6 cont10 L0R0 4w		B6 Cont10 L0R0 4w							B6 cont10 L0R0 4w	B6cont10 L0R0 P60
			B6 cont10 L0R1 4w		B6Cont10 L0R1 4w							B6 cont10 L0R1 4w	B6cont10 L0R1 P60
			B6 cont10 L1R0 4w		B6cont10 L1R0 4w							B6 cont10 L1R0 4w	B6cont10 L1R0 P60
			B6 cont10 L1R1 4w		B6cont10 L1R1 4w							B6 cont10 L1R1 4w	B6cont10 L1R1 P60
			B6 Cont11 L0R0 P31	B6 Cont11♂ L0R0								B6 Cont11 L0R0 P31	B6Cont11 L0R0 P59	B6 Cont11♂ L0R0	B6cont11♂L0R0
			B6 Cont11 L0R1 P31	B6 Cont11 ♂L0R1								B6 Cont11 L0R1 P31	B6Cont11 L0R1 P59	B6 Cont11 ♂L0R1	B6cont11♂L0R1

## Sheet: Behavioral test cross-fostering
HCA=24hr home cage activity test		HCA 4W-control	OF 4W-control		HCA 4W-FMAB TMControl	OF 4W-FMAB TMControl		HCA 4W-FMControl TMAB	OF 4W-FMControl TMAB
OF=Open field test		B6ContCL0R0P32	B6ContC♂L0R0		FMB6ABETMContA & B L0R0 P28	FMB6ABETMContA & B L0R0 P28		FMB6ContA TMB6ABEL0R0P32	FMB6ContA TMB6ABEL0R0P32
		B6ContCL0R1P32	B6ContC♂L0R1		FMB6ABETMContA & B L0R1 P28	FMB6ABETMContA & B L0R1 P28		FMB6ContA TMB6ABEL0R1 P32	FMB6ContA TMB6ABEL0R1 P32
		B6ContC L1R0 P28	B6ContC♂L1R0		FMB6ABETMContA & B L1R0 P28	FMB6ABETMContA & B L1R0 P28		FMB6ContH TMB6ABH L0R0 P30	FMB6ContH TMB6ABH L0R0 P30
		B6ContC L1R1 P28	B6ContC♂L1R1		FMB6ABETMContA & B L1R1 P28	FMB6ABETMContA & B L1R1 P28		FMB6ContI TMB6ABJ L0R1 P30	FMB6ContI TMB6ABJ L0R1 P30
		B6ContC L0R2 P28	B6ContC♂L0R2		FM B6ABE/TM B6ContA&B ♂-2L0R0	FM B6ABE/TM B6ContA&B ♂-2L0R0		FMB6ContI TMB6ABJ L1R0 P30	FMB6ContI TMB6ABJ L1R0 P30
		B6ContC L2R0 P28	B6ContC♂L2R0		FM B6ABE/TM B6ContA&B ♂-2L0R1	FM B6ABE/TM B6ContA&B ♂-2L0R1		FMB6ContI TMB6ABJ L1R1 P30	FMB6ContI TMB6ABJ L1R1 P30
		B6ContDL0R0 P30	B6ContD♂L0R0		FM B6ABE/TM B6ContA&B ♂-2L1R0	FM B6ABE/TM B6ContA&B ♂-2L1R0		FMB6ContL TMB6ABN L0R0 P30	FMB6ContL TMB6ABN L0R0 P30
		B6ContDL0R1 P30	B6ContD♂L0R1		FM B6ABE/TM B6ContA&B ♂-2L1R1	FM B6ABE/TM B6ContA&B ♂-2L1R1		FMB6ContK TMB6ABM L0R2 P29	FMB6ContK TMB6ABM L0R2 P29
		B6ContDL1R0 P30	B6ContD♂L1R0		FMB6ABF TMB6ContG L0R0 P30	FMB6ABF TMB6ContG L0R0 P30		FMB6ContL TMB6ABN L0R1 P30	FMB6ContL TMB6ABN L0R1 P30
		B6ContDL1R1 P30	B6ContD♂L1R1		FMB6ABF TMB6ContG L0R1 P30	FMB6ABF TMB6ContG L0R1 P30		FMB6ContN TMABO&P L0R0 P28	FMB6ContN TMABO&P L0R0 P28
		B6ContDL0R2P32	B6ContD♂L2R0		FMB6ABF TMB6ContG L1R0 P30	FMB6ABF TMB6ContG L1R0 P30		FMB6ContN TMABO&P L0R1 P28	FMB6ContN TMABO&P L0R1 P28
		B6ContEL0R0P32	B6contE♂L0R0		FMB6ABF TMB6ContG L1R1 P30	FMB6ABF TMB6ContG L1R1 P30		FMB6ContN TMABO&P L0R2 P28	FMB6ContN TMABO&P L0R2 P28
		B6ContEL0R1P32	B6contE♂L0R1		FMB6AB H TMCont H L0R0 P28	FMB6AB H TMCont H L0R0 P28		FMB6ContN TMABO&P L2R0 P28	FMB6ContN TMABO&P L2R0 P28
		B6ContEL1R0P32	B6contE♂L1R0		FMB6AB H TMCont H L0R1 P28	FMB6AB H TMCont H L0R1 P28		FMB6ContN TMB6ABO&P L1R0 P30	FMB6ContN TMB6ABO&P L1R0 P30
		B6Cont F L0R0 P28	B6ContF♂L0R2		FMB6AB H TMCont H L1R0 P28	FMB6AB H TMCont H L1R0 P28		FMB6ContN TMB6ABO&P L1R1 P30	FMB6ContN TMB6ABO&P L1R1 P30
		B6Cont F L0R1 P28	B6ContF♂L1R1		FMB6ABJ TMB6ContI L0R0 P32	FMB6ABJ TMB6ContI L0R0 P32		FMB6ContO TMB6ABS L0R0 P32	FMB6ContO TMB6ABS L0R0 P32
		B6Cont F L1R0 P28	B6ContF♂L0R0		FMB6ABJ TMB6ContI L0R1 P32	FMB6ABJ TMB6ContI L0R1 P32		FMB6ContO TMB6ABS L0R1 P32	FMB6ContO TMB6ABS L0R1 P32
		B6Cont F L1R1 P28	B6ContF♂L0R1		FMB6ABJ TMB6ContI L1R0 P32	FMB6ABJ TMB6ContI L1R0 P32		FMB6ContO TMB6ABS L1R0 P32	FMB6ContO TMB6ABS L1R0 P32
		B6Cont F L0R2 P28	B6ContF♂L1R0		FMB6ABJ TMB6ContI L1R1 P32	FMB6ABJ TMB6ContI L1R1 P32		FMB6ContO TMB6ABS L1R1 P32	FMB6ContO TMB6ABS L1R1 P32
		B6ContQ L0R1 P32	B6ContQ L0R1 P30		FMB6ABJ TMB6ContI L0R2 P32	FMB6ABJ TMB6ContI L0R2 P32		FMB6ContO TMB6ABS L0R2 P32	FMB6ContO TMB6ABS L0R2 P32
			B6ContQ L1R0 P32		FMB6ABK TMB6ContJ L0R0 P32	FMB6ABK TMB6ContJ L0R0 P32		FMB6ContP TMB6ABT L2R0 P32	FMB6ContP TMB6ABT L2R0 P32
			B6ContQ L1R1 P32		FMB6ABK TMB6ContJ L0R1 P32	FMB6ABK TMB6ContJ L0R1 P32
			B6ContR L0R0 P32		FMB6ABN TMContL L0R0 P28	FMB6ABN TMContL L0R0 P28
			B6ContR L0R1 P32		FMB6ABN TMContL L0R1 P28	FMB6ABN TMContL L0R1 P28
		B6ContR L1R0 P32	B6ContR L1R0 P31		FMB6ABN TMContL L1R0 P28	FMB6ABN TMContL L1R0 P28
					FMB6ABN TMContL L1R1 P28	FMB6ABN TMContL L1R1 P28
					FMB6ABP TMB6ContN L0R0 P30	FMB6ABP TMB6ContN L0R0 P30
					FMB6ABP TMB6ContN L0R1 P30	FMB6ABP TMB6ContN L0R1 P30
